# Supplementary material for: Coral Reef Benthos Classification Using Data from a Short-Range Multispectral Sensor
Source: MDPI journal article supplement (doi:10.3390/rs14225782), 2022-11-16
Supplement: s1 [file s1]

Supplementary Data for “Coral Reef Benthos Classification Using Data From a Short-range Multispectral Sensor” by Garza-Pérez JR & F Barrón-Coronel

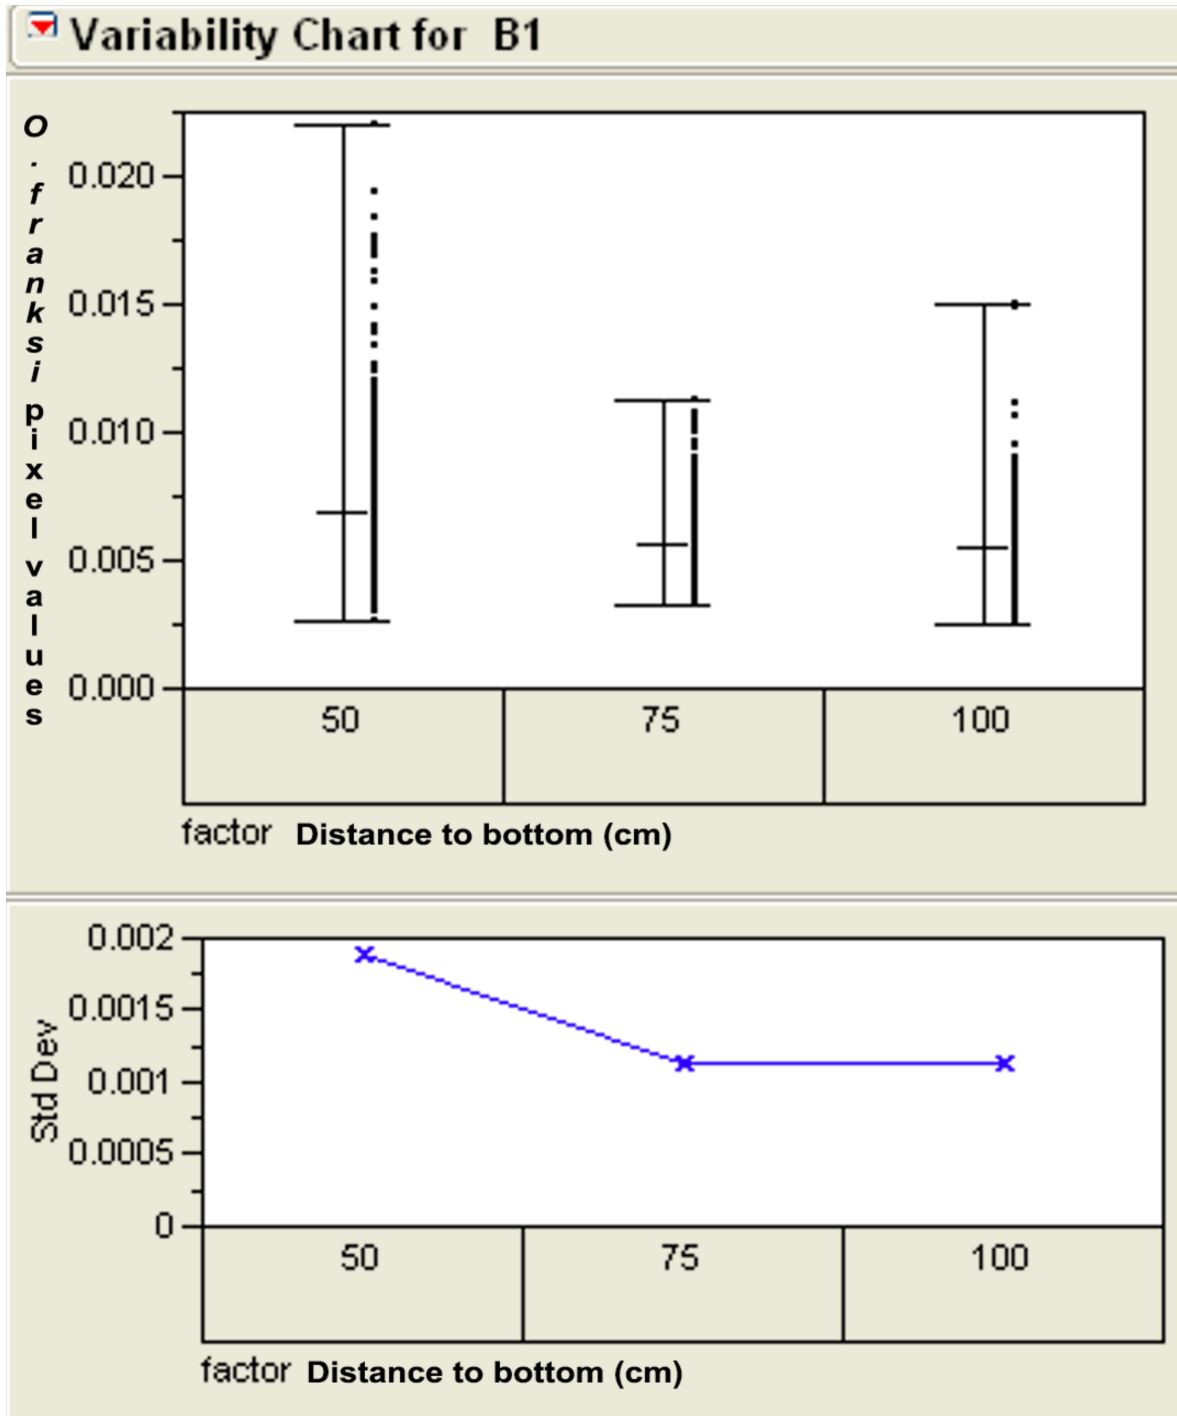

**Figure S1.** Comparison of Blue band pixel values of an *Orbicella franksi* coral colony, acquired at different distances with the MicaSense RedEdge-M multispectral camera, and with 2 Keldan 8X video lights at full power (13,000 lumen).

### ▢ Variability Chart for B2

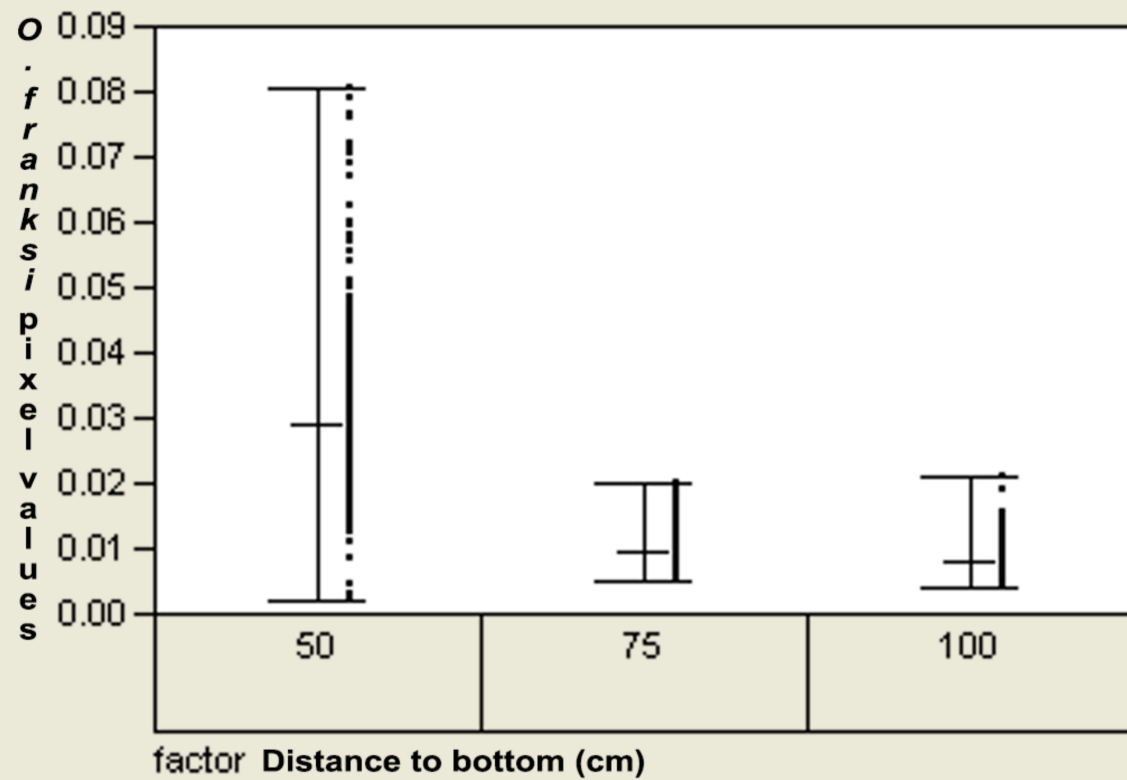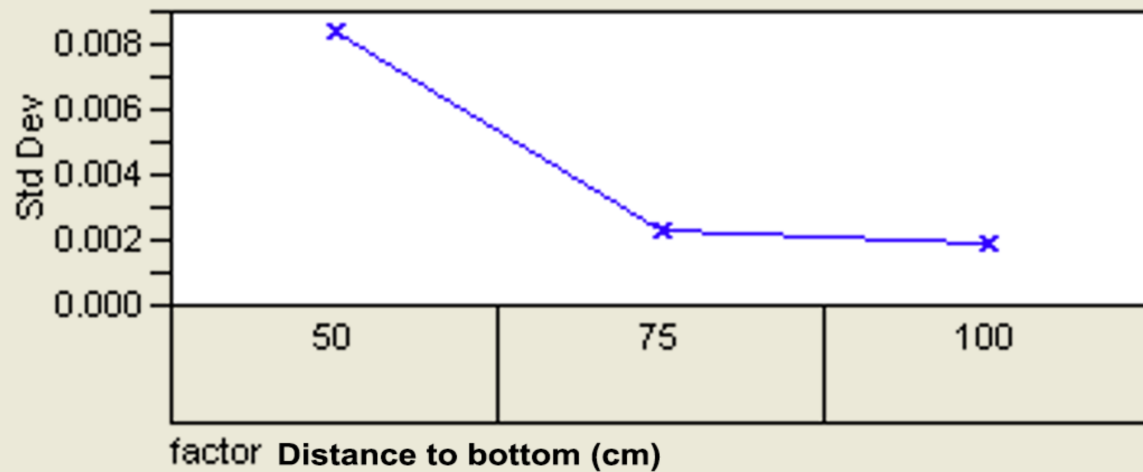

**Figure S2.** Comparison of Green band pixel values of an *Orbicella franksi* coral colony, acquired at different distances with the MicaSense RedEdge-M multispectral camera, and with 2 Keldan 8X video lights at full power (13,000 lumen).

### Variability Chart for B3

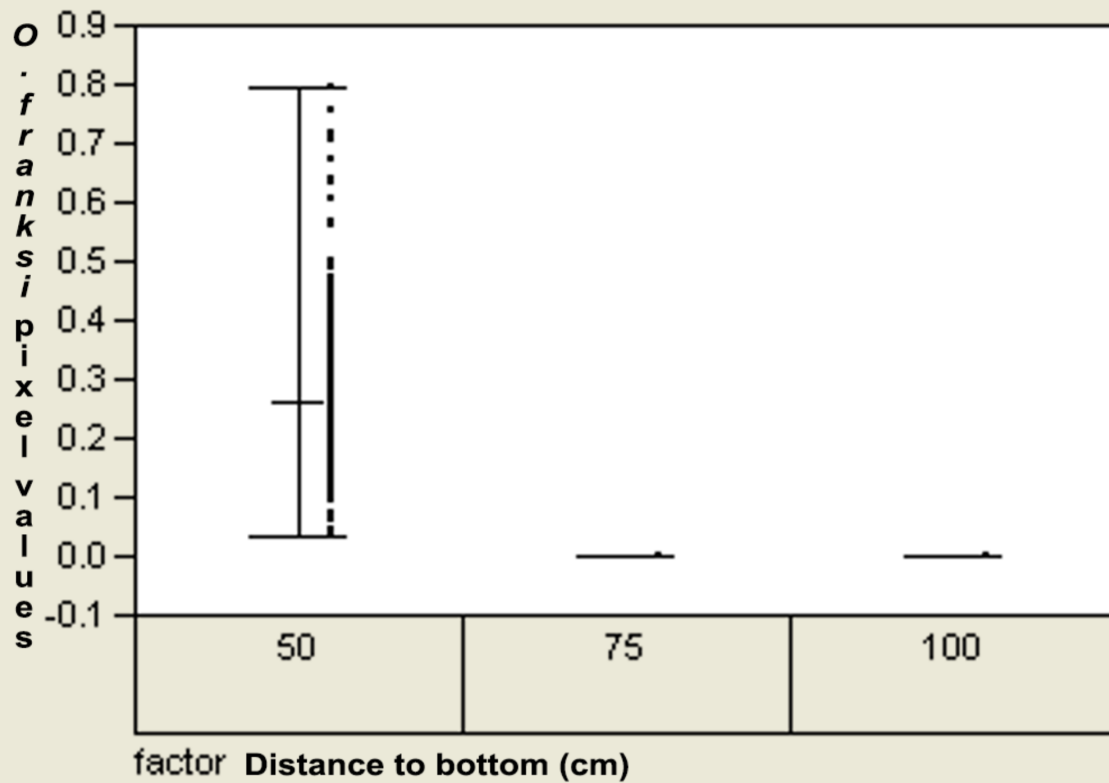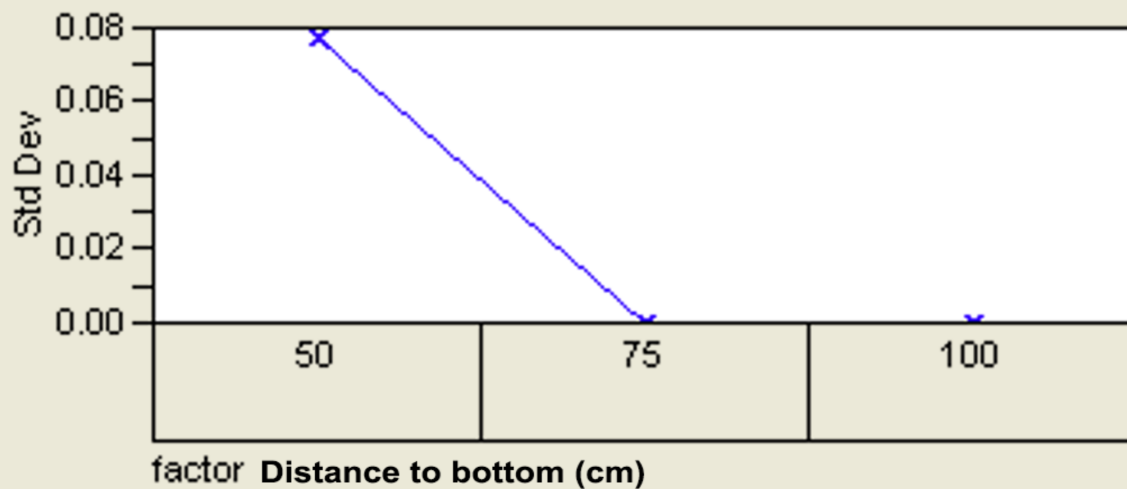

**Figure S3.** Comparison of Red band pixel values of an *Orbicella franksi* coral colony, acquired at different distances with the MicaSense RedEdge-M multispectral camera, and with 2 Keldan 8X video lights at full power (13,000 lumen).

### ▢ Variability Chart for B4

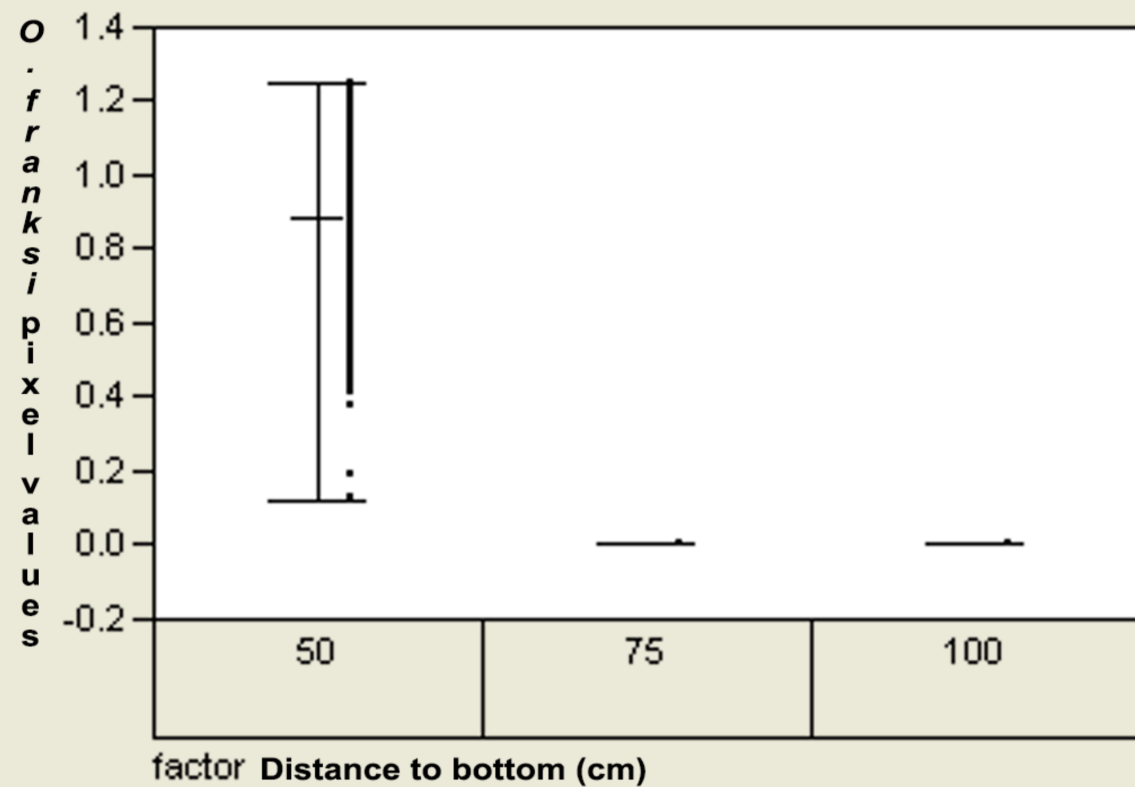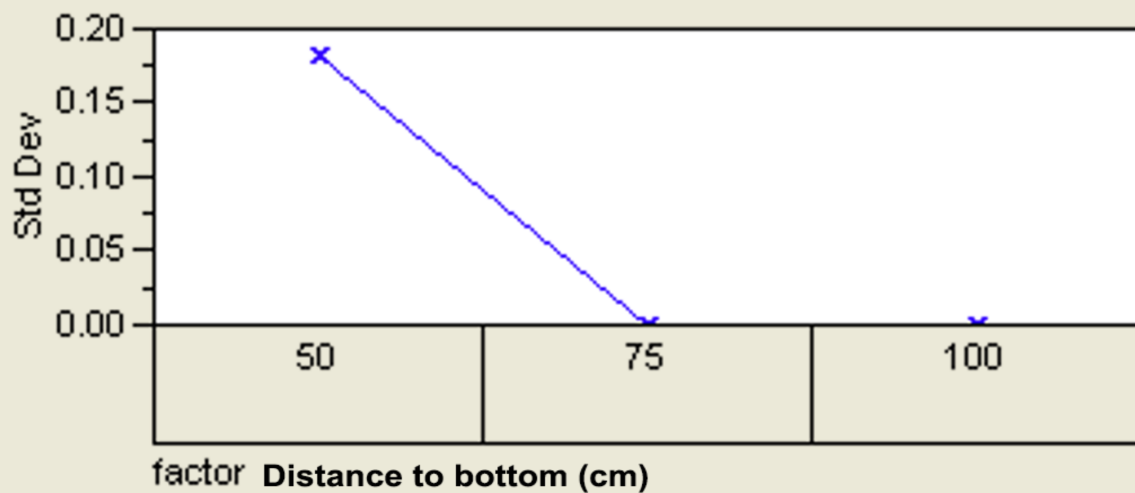

**Figure S4.** Comparison of Red Edge band pixel values of an *Orbicella franksi* coral colony, acquired at different distances with the MicaSense RedEdge-M multispectral camera, and with 2 Keldan 8X video lights at full power (13,000 lumen).

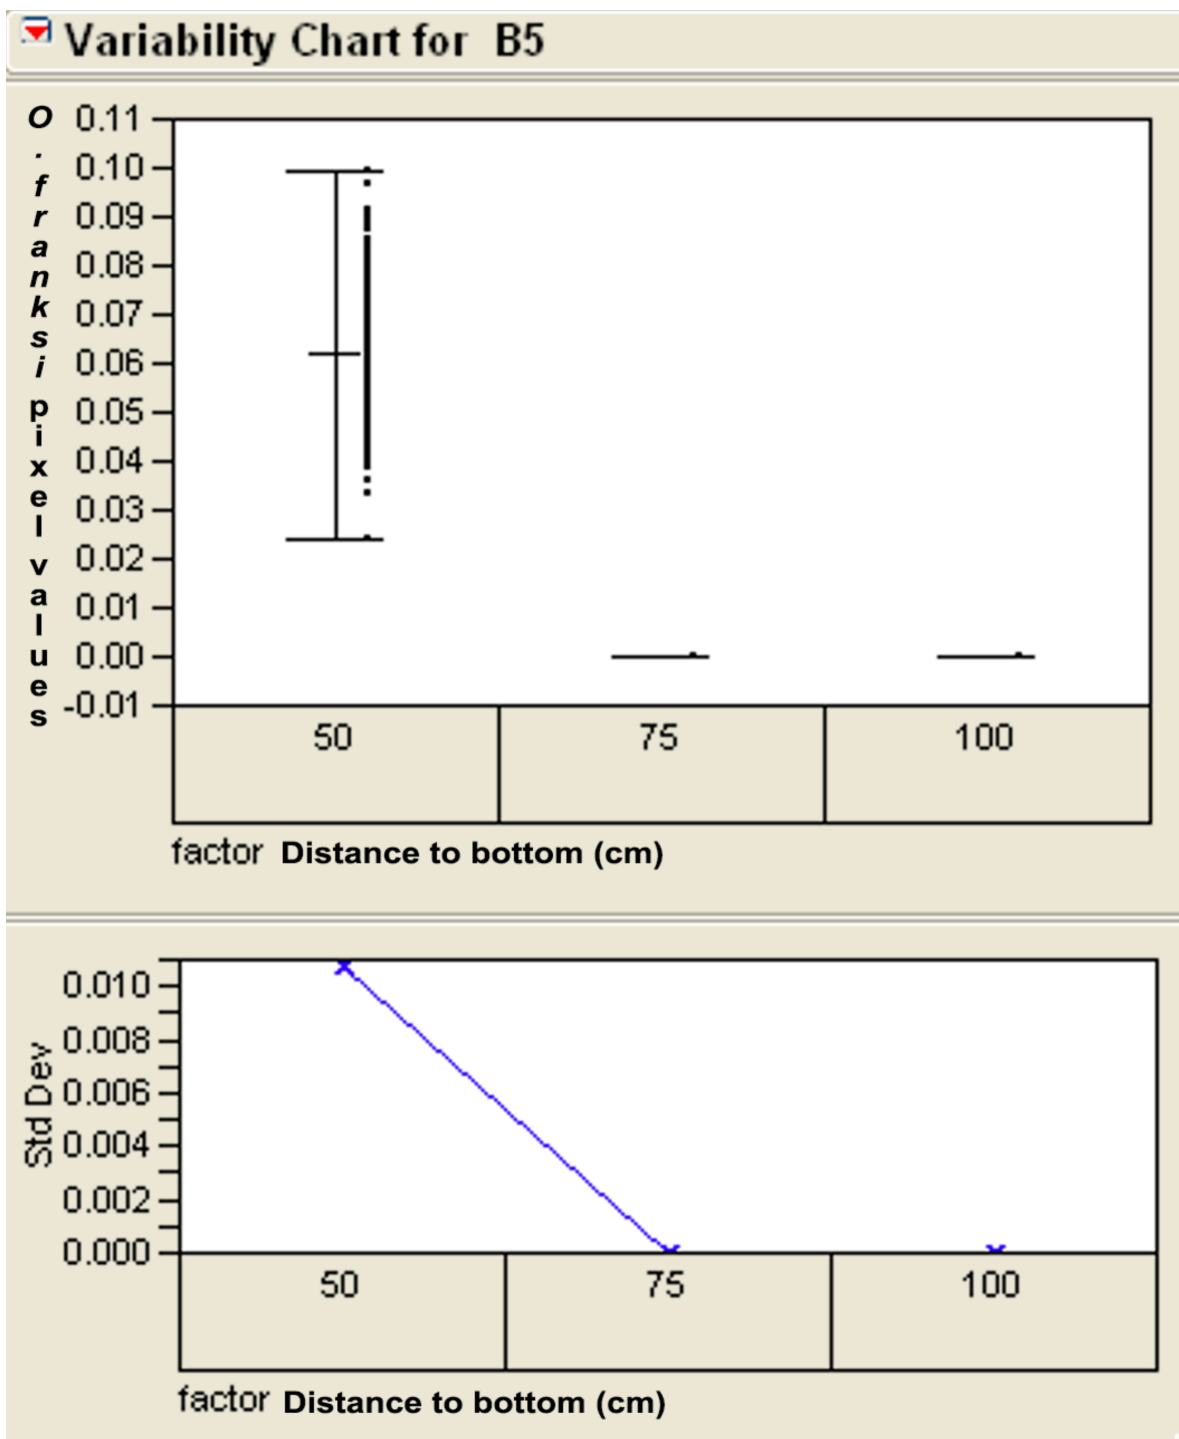

**Figure S5.** Comparison of Near Infrared band pixel values of an *Orbicella franksi* coral colony, acquired at different distances with the MicaSense RedEdge-M multispectral camera, and with 2 Keldan 8X video lights at full power (13,000 lumen).

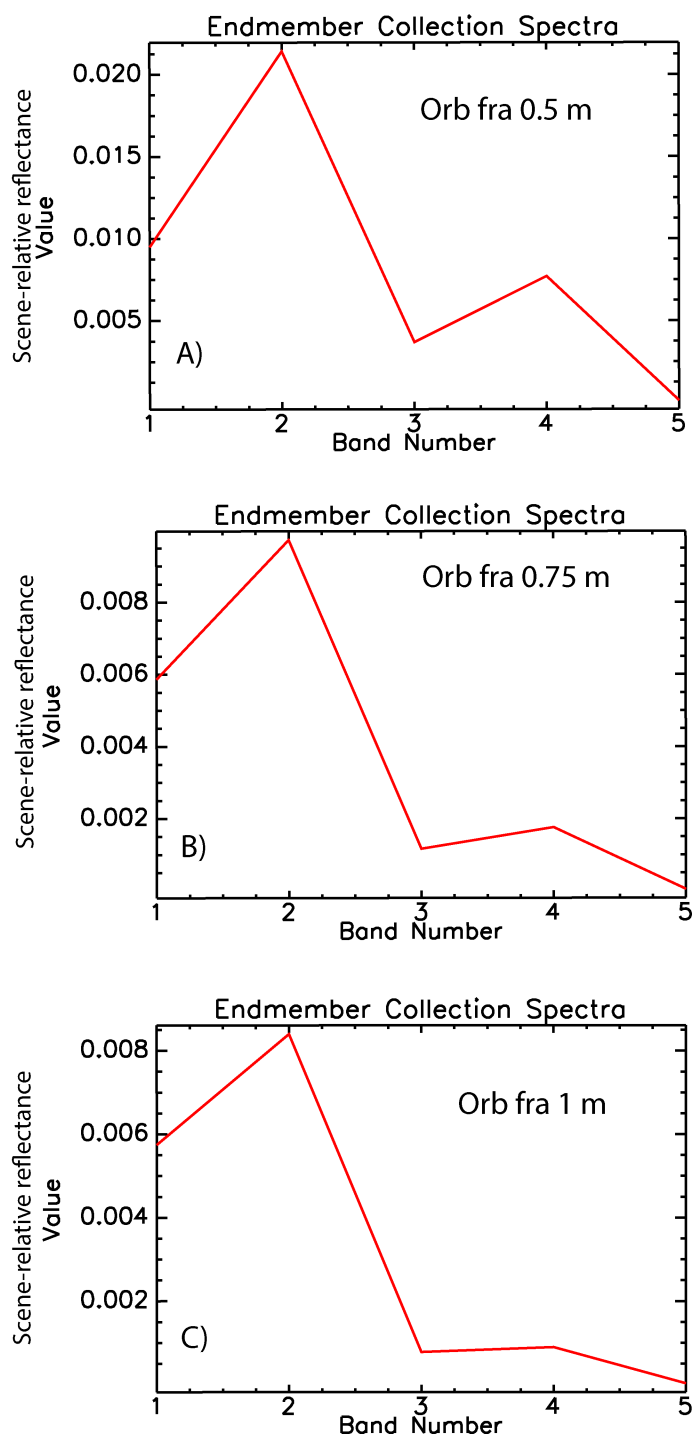

**Figure S6.** Spectral signatures of a coral colony of *Orbicella franksi* acquired at different distances with the MicaSense RedEdge-M multispectral camera, and with 2 Keldan 8X video lights at full power (13,000 lumen). Bands number: 1, Blue 465-685 nm; 2, Green 550-570 nm; 3, Red 663-673 nm; 4, Red Edge 712-722 nm; 5, Near Infrared 820-560 nm.

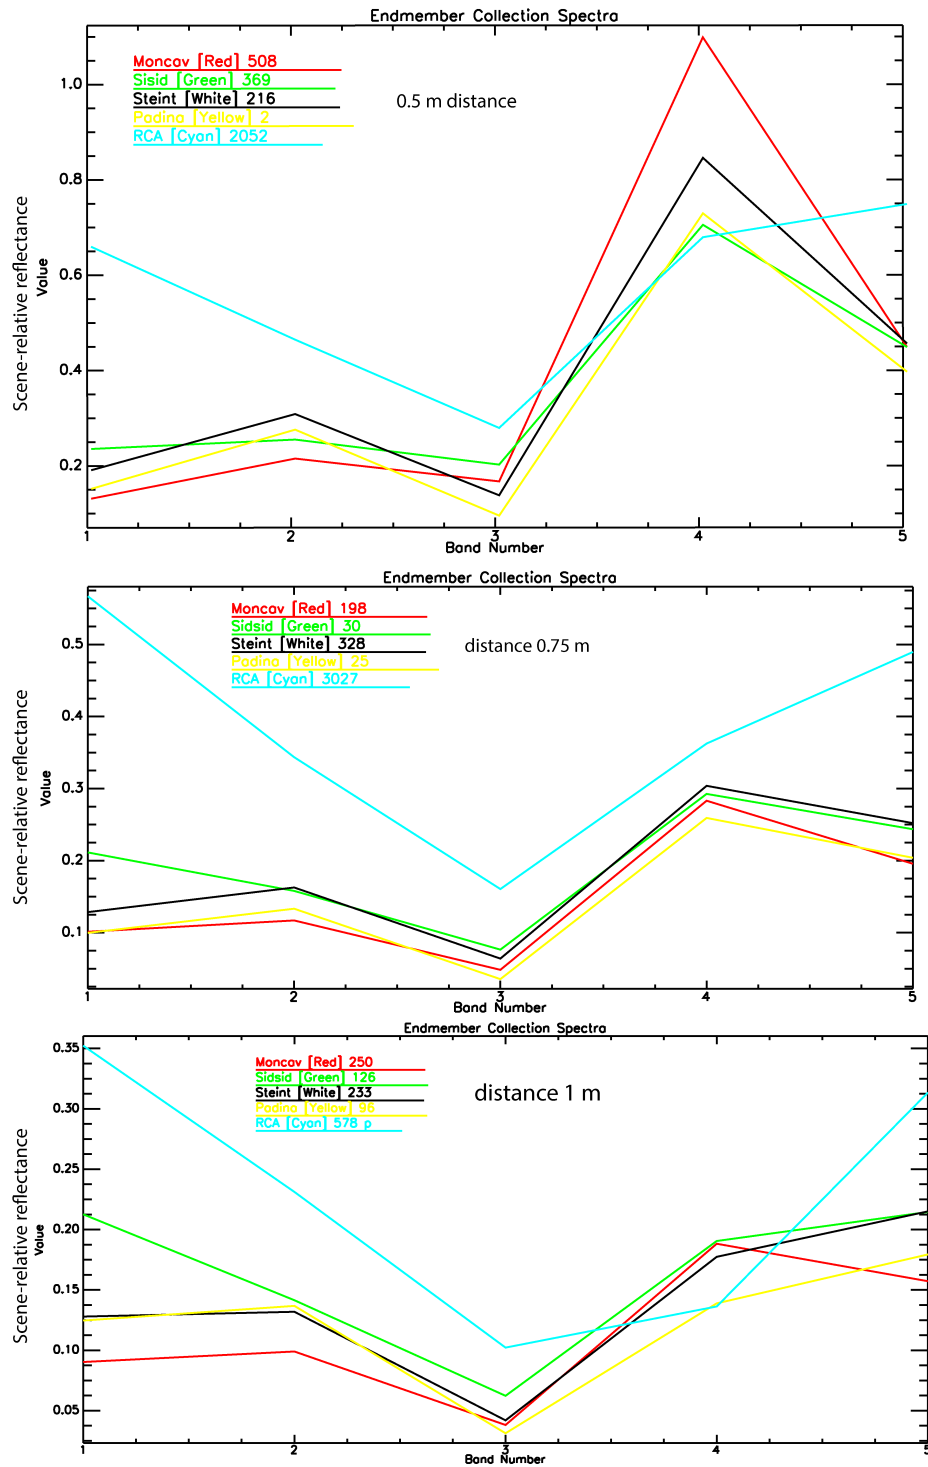

**Figure S7.** Spectral signatures of reef benthic components *Montastraea cavernosa* (red), *Siderastraea siderea* (green), *Stephanocoenia intersepta* (white), brown algae Genus *Padina* (yellow), red encrusting algae (cyan), acquired at different distances with the MicaSense RedEdge-M multispectral camera, and with 2 Keldan 8X video lights at full power (13,000 lumen). Bands number: 1, Blue 465-685 nm; 2, Green 550-570 nm; 3, Red 663-673 nm; 4, Red Edge 712-722 nm; 5, Near Infrared 820-560 nm.

Table S1. Subplot BI, 12 classes ROI separation values (Jeffries-Matusita, Transformed Divergence)

agaaga:  
 orbfra: (1.74991331 1.99669979)  
 milalc: (1.99976098 1.99999987)  
 cliona: (1.99292999 2.00000000)  
 moncav: (1.97267309 1.99492652)  
 calvag: (1.99999987 2.00000000)  
 leadl: (1.99999995 2.00000000)  
 dycti: (1.99747322 1.99999033)  
 padina: (1.99877052 1.99993408)  
 CCA: (1.89033708 1.92275556)  
 filalg: (1.97915322 2.00000000)  
 octoc: (1.99997391 1.99999892)

orbfra:  
 agaaga: (1.74991331 1.99669979)  
 milalc: (2.00000000 2.00000000)  
 cliona: (1.85617810 1.94640330)  
 moncav: (1.98428570 1.99920520)  
 calvag: (1.99991907 2.00000000)  
 leadl: (1.99993164 2.00000000)  
 dycti: (1.89903675 1.94211727)  
 padina: (1.95287655 1.99210411)  
 CCA: (1.99212485 1.99999998)  
 filalg: (1.94099737 1.98973716)  
 octoc: (1.99486922 1.99999534)

milalc:  
 agaaga: (1.99976098 1.99999987)  
 orbfra: (2.00000000 2.00000000)  
 cliona: (2.00000000 2.00000000)  
 moncav: (1.99999815 2.00000000)  
 calvag: (2.00000000 2.00000000)  
 leadl: (2.00000000 2.00000000)  
 dycti: (2.00000000 2.00000000)  
 padina: (2.00000000 2.00000000)  
 CCA: (1.99042478 1.99987248)  
 filalg: (2.00000000 2.00000000)  
 octoc: (2.00000000 2.00000000)

cliona:  
 agaaga: (1.99292999 2.00000000)  
 orbfra: (1.85617810 1.94640330)  
 milalc: (2.00000000 2.00000000)  
 moncav: (1.96025132 1.99997934)  
 calvag: (1.99784468 2.00000000)  
 leadl: (1.99892889 2.00000000)  
 dycti: (1.45236840 1.60116811)



padina: (1.89466481 1.99412885)  
CCA: (1.98345416 2.00000000)  
filalg: (1.59108380 1.89536613)  
octoc: (1.97277777 1.99798359)

moncav:

agaaga: (1.97267309 1.99492652)  
orbfra: (1.98428570 1.99920520)  
milalc: (1.99999815 2.00000000)  
cliona: (1.96025132 1.99997934)  
calvag: (1.98964677 1.99999749)  
leadl: (1.97832852 1.99987257)  
dycti: (1.75739262 1.99976552)  
padina: (1.57586059 1.89295191)  
CCA: (1.85520959 1.99910205)  
filalg: (1.95723209 1.99999998)  
octoc: (1.65601102 1.99260549)

calvag:

agaaga: (1.99999987 2.00000000)  
orbfra: (1.99991907 2.00000000)  
milalc: (2.00000000 2.00000000)  
cliona: (1.99784468 2.00000000)  
moncav: (1.98964677 1.99999749)  
leadl: (1.80715369 1.93611540)  
dycti: (1.97452627 1.99985870)  
padina: (1.99933004 1.99999246)  
CCA: (1.91682495 1.99999138)  
filalg: (1.96595364 1.99979981)  
octoc: (1.95032615 1.98925993)

leadl:

agaaga: (1.99999995 2.00000000)  
orbfra: (1.99993164 2.00000000)  
milalc: (2.00000000 2.00000000)  
cliona: (1.99892889 2.00000000)  
moncav: (1.97832852 1.99987257)  
calvag: (1.80715369 1.93611540)  
dycti: (1.96402906 1.99998756)  
padina: (1.99731720 1.99994939)  
CCA: (1.78948722 1.99091169)  
filalg: (1.99264861 2.00000000)  
octoc: (1.92583612 1.99995087)

dycti:

agaaga: (1.99747322 1.99999033)  
orbfra: (1.89903675 1.94211727)  
milalc: (2.00000000 2.00000000)  
cliona: (1.45236840 1.60116811)  
moncav: (1.75739262 1.99976552)

calvag: (1.97452627 1.99985870)  
leadl: (1.96402906 1.99998756)  
padina: (1.72009627 1.95241410)  
CCA: (1.91585096 1.99999180)  
filalg: (1.75730366 1.94382424)  
octoc: (1.15826383 1.34373427)

padina:

agaaga: (1.99877052 1.99993408)  
orbfra: (1.95287655 1.99210411)  
milalc: (2.00000000 2.00000000)  
cliona: (1.89466481 1.99412885)  
moncav: (1.57586059 1.89295191)  
calvag: (1.99933004 1.99999246)  
leadl: (1.99731720 1.99994939)  
dycti: (1.72009627 1.95241410)  
CCA: (1.95547245 1.99999389)  
filalg: (1.97277401 1.99977228)  
octoc: (1.86050193 1.94495859)

CCA:

agaaga: (1.89033708 1.92275556)  
orbfra: (1.99212485 1.99999998)  
milalc: (1.99042478 1.99987248)  
cliona: (1.98345416 2.00000000)  
moncav: (1.85520959 1.99910205)  
calvag: (1.91682495 1.99999138)  
leadl: (1.78948722 1.99091169)  
dycti: (1.91585096 1.99999180)  
padina: (1.95547245 1.99999389)  
filalg: (1.95636462 2.00000000)  
octoc: (1.88734542 1.99999889)

filalg:

agaaga: (1.97915322 2.00000000)  
orbfra: (1.94099737 1.98973716)  
milalc: (2.00000000 2.00000000)  
cliona: (1.59108380 1.89536613)  
moncav: (1.95723209 1.99999998)  
calvag: (1.96595364 1.99979981)  
leadl: (1.99264861 2.00000000)  
dycti: (1.75730366 1.94382424)  
padina: (1.97277401 1.99977228)  
CCA: (1.95636462 2.00000000)  
octoc: (1.97653027 1.99914922)

octoc:

agaaga: (1.99997391 1.99999892)  
orbfra: (1.99486922 1.99999534)  
milalc: (2.00000000 2.00000000)

cliona: (1.97277777 1.99798359)  
moncav: (1.65601102 1.99260549)  
calvag: (1.95032615 1.98925993)  
leadl: (1.92583612 1.99995087)  
dycti: (1.15826383 1.34373427)  
padina: (1.86050193 1.94495859)  
CCA: (1.88734542 1.99999889)  
filalg: (1.97653027 1.99914922)

Pair Separation (least to most);

dycti and octoc - 1.15826383  
cliona and dycti - 1.45236840  
moncav and padina - 1.57586059  
cliona and filalg - 1.59108380  
moncav and octoc - 1.65601102  
dycti and padina - 1.72009627  
agaaga and orbfra - 1.74991331  
dycti and filalg - 1.75730366  
moncav and dycti - 1.75739262  
leadl and CCA - 1.78948722  
calvag and leadl - 1.80715369  
moncav and CCA - 1.85520959  
orbfra and cliona - 1.85617810  
padina and octoc - 1.86050193  
CCA and octoc - 1.88734542  
agaaga and CCA - 1.89033708  
cliona and padina - 1.89466481  
orbfra and dycti - 1.89903675  
dycti and CCA - 1.91585096  
calvag and CCA - 1.91682495  
leadl and octoc - 1.92583612  
orbfra and filalg - 1.94099737  
calvag and octoc - 1.95032615  
orbfra and padina - 1.95287655  
padina and CCA - 1.95547245  
CCA and filalg - 1.95636462  
moncav and filalg - 1.95723209  
cliona and moncav - 1.96025132  
leadl and dycti - 1.96402906  
calvag and filalg - 1.96595364  
agaaga and moncav - 1.97267309  
padina and filalg - 1.97277401  
cliona and octoc - 1.97277777  
calvag and dycti - 1.97452627  
filalg and octoc - 1.97653027  
moncav and leadl - 1.97832852  
agaaga and filalg - 1.97915322  
cliona and CCA - 1.98345416  
orbfra and moncav - 1.98428570

moncav and calvag - 1.98964677  
milalc and CCA - 1.99042478  
orbfra and CCA - 1.99212485  
leadl and filalg - 1.99264861  
agaaga and cliona - 1.99292999  
orbfra and octoc - 1.99486922  
leadl and padina - 1.99731720  
agaaga and dycti - 1.99747322  
cliona and calvag - 1.99784468  
agaaga and padina - 1.99877052  
cliona and leadl - 1.99892889  
calvag and padina - 1.99933004  
agaaga and milalc - 1.99976098  
orbfra and calvag - 1.99991907  
orbfra and leadl - 1.99993164  
agaaga and octoc - 1.99997391  
milalc and moncav - 1.99999815  
agaaga and calvag - 1.99999987  
agaaga and leadl - 1.99999995  
milalc and leadl - 2.00000000  
milalc and padina - 2.00000000  
milalc and octoc - 2.00000000  
milalc and filalg - 2.00000000  
milalc and calvag - 2.00000000  
milalc and dycti - 2.00000000  
milalc and cliona - 2.00000000  
orbfra and milalc - 2.00000000

Table S2. Confusion Matrix subplot BI, 12 class, SVM

Overall Accuracy = (8075/10221) 79.0040%

Kappa Coefficient = 0.7658

|             |              | Ground Truth (Pixels) |        |           |         |
|-------------|--------------|-----------------------|--------|-----------|---------|
| Class       |              | Agaaga_AA             | Cliona | Calvag_AA | Lead_AA |
| Dyctiota_AA | Unclassified | 0                     | 0      | 0         | 0       |
| 0           |              |                       |        |           |         |
|             | agaaga       | 458                   | 0      | 0         | 0       |
| 0           |              |                       |        |           |         |
|             | cliona       | 1                     | 1354   | 0         | 0       |
| 422         |              |                       |        |           |         |
|             | calvag       | 0                     | 0      | 451       | 74      |
| 0           |              |                       |        |           |         |
|             | leadl        | 0                     | 0      | 49        | 652     |
| 0           |              |                       |        |           |         |
|             | dycti        | 6                     | 19     | 6         | 10      |
| 603         |              |                       |        |           |         |
|             | milalc       | 7                     | 0      | 0         | 0       |
| 0           |              |                       |        |           |         |
|             | moncav       | 22                    | 1      | 0         | 8       |
| 24          |              |                       |        |           |         |
|             | CCA          | 118                   | 4      | 0         | 7       |
| 0           |              |                       |        |           |         |
|             | filalg       | 2                     | 57     | 6         | 1       |
| 43          |              |                       |        |           |         |
|             | octoc        | 0                     | 0      | 0         | 4       |
| 34          |              |                       |        |           |         |
|             | orbfav       | 52                    | 34     | 0         | 0       |
| 43          |              |                       |        |           |         |
|             | padina       | 13                    | 5      | 0         | 3       |
| 110         |              |                       |        |           |         |
|             | Total        | 679                   | 1474   | 512       | 759     |
| 1279        |              |                       |        |           |         |

|          |              | Ground Truth (Pixels) |           |        |           |
|----------|--------------|-----------------------|-----------|--------|-----------|
| Class    |              | Milalc_AA             | Moncav_AA | CCA_AA | FilAlg_AA |
| Octoc_AA | Unclassified | 0                     | 0         | 0      | 0         |
| 0        |              |                       |           |        |           |
|          | agaaga       | 10                    | 0         | 33     | 0         |
| 0        |              |                       |           |        |           |
|          | cliona       | 0                     | 1         | 0      | 96        |
| 0        |              |                       |           |        |           |
|          | calvag       | 2                     | 0         | 0      | 82        |
| 2        |              |                       |           |        |           |
|          | leadl        | 1                     | 1         | 2      | 1         |

|     |        |     |     |     |     |
|-----|--------|-----|-----|-----|-----|
| 13  |        |     |     |     |     |
|     | dycti  | 0   | 19  | 0   | 26  |
| 95  |        |     |     |     |     |
|     | milalc | 705 | 0   | 0   | 0   |
| 0   |        |     |     |     |     |
|     | moncav | 15  | 294 | 6   | 0   |
| 3   |        |     |     |     |     |
|     | CCA    | 38  | 5   | 607 | 0   |
| 8   |        |     |     |     |     |
|     | filalg | 0   | 0   | 0   | 631 |
| 5   |        |     |     |     |     |
|     | octoc  | 0   | 23  | 0   | 0   |
| 194 |        |     |     |     |     |
|     | orbfav | 2   | 2   | 0   | 11  |
| 0   |        |     |     |     |     |
|     | padina | 10  | 25  | 0   | 0   |
| 5   |        |     |     |     |     |
|     | Total  | 783 | 370 | 648 | 847 |
| 325 |        |     |     |     |     |

| Class        | Ground Truth (Pixels) |           | Total |
|--------------|-----------------------|-----------|-------|
|              | Orbfra_AA             | Padina_AA |       |
| Unclassified | 0                     | 0         | 0     |
| agaaga       | 34                    | 0         | 535   |
| cliona       | 250                   | 3         | 2127  |
| calvag       | 0                     | 0         | 611   |
| leadl        | 0                     | 0         | 719   |
| dycti        | 15                    | 30        | 829   |
| milalc       | 0                     | 0         | 712   |
| moncav       | 2                     | 48        | 423   |
| CCA          | 0                     | 8         | 795   |
| filalg       | 18                    | 0         | 763   |
| octoc        | 0                     | 1         | 256   |
| orbfav       | 1410                  | 2         | 1556  |
| padina       | 8                     | 716       | 895   |
| Total        | 1737                  | 808       | 10221 |

| Class        | Ground Truth (Percent) |        | Calvag_AA | Lead_AA |
|--------------|------------------------|--------|-----------|---------|
|              | Agaaga_AA              | Cliona |           |         |
| Dyctiota_AA  |                        |        |           |         |
| Unclassified | 0.00                   | 0.00   | 0.00      | 0.00    |
| 0.00         |                        |        |           |         |
| agaaga       | 67.45                  | 0.00   | 0.00      | 0.00    |

|        |        |        |        |        |        |
|--------|--------|--------|--------|--------|--------|
| 0.00   |        |        |        |        |        |
|        | cliona | 0.15   | 91.86  | 0.00   | 0.00   |
| 32.99  |        |        |        |        |        |
|        | calvag | 0.00   | 0.00   | 88.09  | 9.75   |
| 0.00   |        |        |        |        |        |
|        | leadl  | 0.00   | 0.00   | 9.57   | 85.90  |
| 0.00   |        |        |        |        |        |
|        | dycti  | 0.88   | 1.29   | 1.17   | 1.32   |
| 47.15  |        |        |        |        |        |
|        | milalc | 1.03   | 0.00   | 0.00   | 0.00   |
| 0.00   |        |        |        |        |        |
|        | moncav | 3.24   | 0.07   | 0.00   | 1.05   |
| 1.88   |        |        |        |        |        |
|        | CCA    | 17.38  | 0.27   | 0.00   | 0.92   |
| 0.00   |        |        |        |        |        |
|        | filalg | 0.29   | 3.87   | 1.17   | 0.13   |
| 3.36   |        |        |        |        |        |
|        | octoc  | 0.00   | 0.00   | 0.00   | 0.53   |
| 2.66   |        |        |        |        |        |
|        | orbfav | 7.66   | 2.31   | 0.00   | 0.00   |
| 3.36   |        |        |        |        |        |
|        | padina | 1.91   | 0.34   | 0.00   | 0.40   |
| 8.60   |        |        |        |        |        |
|        | Total  | 100.00 | 100.00 | 100.00 | 100.00 |
| 100.00 |        |        |        |        |        |

|          |              | Ground Truth (Percent) |           | CCA_AA | FilAlg_AA |
|----------|--------------|------------------------|-----------|--------|-----------|
| Class    |              | Milalc_AA              | Moncav_AA |        |           |
| Octoc_AA |              |                        |           |        |           |
|          | Unclassified | 0.00                   | 0.00      | 0.00   | 0.00      |
| 0.00     |              |                        |           |        |           |
|          | agaaga       | 1.28                   | 0.00      | 5.09   | 0.00      |
| 0.00     |              |                        |           |        |           |
|          | cliona       | 0.00                   | 0.27      | 0.00   | 11.33     |
| 0.00     |              |                        |           |        |           |
|          | calvag       | 0.26                   | 0.00      | 0.00   | 9.68      |
| 0.62     |              |                        |           |        |           |
|          | leadl        | 0.13                   | 0.27      | 0.31   | 0.12      |
| 4.00     |              |                        |           |        |           |
|          | dycti        | 0.00                   | 5.14      | 0.00   | 3.07      |
| 29.23    |              |                        |           |        |           |
|          | milalc       | 90.04                  | 0.00      | 0.00   | 0.00      |
| 0.00     |              |                        |           |        |           |
|          | moncav       | 1.92                   | 79.46     | 0.93   | 0.00      |
| 0.92     |              |                        |           |        |           |
|          | CCA          | 4.85                   | 1.35      | 93.67  | 0.00      |
| 2.46     |              |                        |           |        |           |
|          | filalg       | 0.00                   | 0.00      | 0.00   | 74.50     |
| 1.54     |              |                        |           |        |           |

|        |        |        |        |        |        |
|--------|--------|--------|--------|--------|--------|
| 59.69  | octoc  | 0.00   | 6.22   | 0.00   | 0.00   |
| 0.00   | orbfav | 0.26   | 0.54   | 0.00   | 1.30   |
| 1.54   | padina | 1.28   | 6.76   | 0.00   | 0.00   |
| 100.00 | Total  | 100.00 | 100.00 | 100.00 | 100.00 |

| Class        | Ground Truth (Percent) |           | Total  |
|--------------|------------------------|-----------|--------|
|              | Orbfra_AA              | Padina_AA |        |
| Unclassified | 0.00                   | 0.00      | 0.00   |
| agaaga       | 1.96                   | 0.00      | 5.23   |
| cliona       | 14.39                  | 0.37      | 20.81  |
| calvag       | 0.00                   | 0.00      | 5.98   |
| leadl        | 0.00                   | 0.00      | 7.03   |
| dycti        | 0.86                   | 3.71      | 8.11   |
| milalc       | 0.00                   | 0.00      | 6.97   |
| moncav       | 0.12                   | 5.94      | 4.14   |
| CCA          | 0.00                   | 0.99      | 7.78   |
| filalg       | 1.04                   | 0.00      | 7.47   |
| octoc        | 0.00                   | 0.12      | 2.50   |
| orbfav       | 81.17                  | 0.25      | 15.22  |
| padina       | 0.46                   | 88.61     | 8.76   |
| Total        | 100.00                 | 100.00    | 100.00 |

| Class    | Commission | Omission  | Commission |
|----------|------------|-----------|------------|
| (Pixels) | (Percent)  | (Percent) | (Pixels)   |
| agaaga   | 14.39      | 32.55     | 77/535     |
| cliona   | 36.34      | 8.14      | 773/2127   |
| calvag   | 26.19      | 11.91     | 160/611    |
| leadl    | 9.32       | 14.10     | 67/719     |



|          |       |       |          |
|----------|-------|-------|----------|
| dycti    | 27.26 | 52.85 | 226/829  |
| 676/1279 |       |       |          |
| milalc   | 0.98  | 9.96  | 7/712    |
| 78/783   |       |       |          |
| moncav   | 30.50 | 20.54 | 129/423  |
| 76/370   |       |       |          |
| CCA      | 23.65 | 6.33  | 188/795  |
| 41/648   |       |       |          |
| filalg   | 17.30 | 25.50 | 132/763  |
| 216/847  |       |       |          |
| octoc    | 24.22 | 40.31 | 62/256   |
| 131/325  |       |       |          |
| orbfav   | 9.38  | 18.83 | 146/1556 |
| 327/1737 |       |       |          |
| padina   | 20.00 | 11.39 | 179/895  |
| 92/808   |       |       |          |

| Class     | Prod. Acc. | User Acc. | Prod. Acc. |
|-----------|------------|-----------|------------|
| User Acc. | (Percent)  | (Percent) | (Pixels)   |
| (Pixels)  |            |           |            |
| agaaga    | 67.45      | 85.61     | 458/679    |
| 458/535   |            |           |            |
| cliona    | 91.86      | 63.66     | 1354/1474  |
| 1354/2127 |            |           |            |
| calvag    | 88.09      | 73.81     | 451/512    |
| 451/611   |            |           |            |
| leadl     | 85.90      | 90.68     | 652/759    |
| 652/719   |            |           |            |
| dycti     | 47.15      | 72.74     | 603/1279   |
| 603/829   |            |           |            |
| milalc    | 90.04      | 99.02     | 705/783    |
| 705/712   |            |           |            |
| moncav    | 79.46      | 69.50     | 294/370    |
| 294/423   |            |           |            |
| CCA       | 93.67      | 76.35     | 607/648    |
| 607/795   |            |           |            |
| filalg    | 74.50      | 82.70     | 631/847    |
| 631/763   |            |           |            |
| octoc     | 59.69      | 75.78     | 194/325    |
| 194/256   |            |           |            |
| orbfav    | 81.17      | 90.62     | 1410/1737  |
| 1410/1556 |            |           |            |
| padina    | 88.61      | 80.00     | 716/808    |
| 716/895   |            |           |            |

Table S3. Confusion Matrix subplot BI, 12 class, SVM, Local Sigma Filter

Overall Accuracy = (8344/10221) 81.6358%

Kappa Coefficient = 0.7953

|             |              | Ground Truth (Pixels) |           | CCA_AA | Padina_AA |
|-------------|--------------|-----------------------|-----------|--------|-----------|
| Class       |              | Octoc_AA              | FilAlg_AA |        |           |
| Dyctiota_AA | Unclassified | 0                     | 0         | 0      | 0         |
| 0           | octoc        | 216                   | 0         | 0      | 2         |
| 22          | filalg       | 5                     | 680       | 0      | 0         |
| 26          | CCA          | 11                    | 0         | 610    | 4         |
| 0           | padina       | 5                     | 0         | 0      | 730       |
| 91          | dycti        | 78                    | 26        | 0      | 21        |
| 667         | calvag       | 1                     | 77        | 0      | 0         |
| 0           | moncav       | 2                     | 0         | 7      | 48        |
| 26          | leadl        | 7                     | 0         | 1      | 0         |
| 0           | milalc       | 0                     | 0         | 0      | 0         |
| 0           | cliona       | 0                     | 58        | 0      | 2         |
| 417         | agaaga       | 0                     | 0         | 30     | 0         |
| 0           | orbfav       | 0                     | 6         | 0      | 1         |
| 30          | Total        | 325                   | 847       | 648    | 808       |
| 1279        |              |                       |           |        |           |

|        |              | Ground Truth (Pixels) |           | Lead_AA | Milalc_AA |
|--------|--------------|-----------------------|-----------|---------|-----------|
| Class  |              | Calvag_AA             | Moncav_AA |         |           |
| Cliona | Unclassified | 0                     | 0         | 0       | 0         |
| 0      | octoc        | 0                     | 21        | 0       | 0         |
| 0      | filalg       | 4                     | 0         | 0       | 0         |
| 54     | CCA          | 0                     | 3         | 7       | 32        |
| 4      |              |                       |           |         |           |

|      |        |     |     |     |     |
|------|--------|-----|-----|-----|-----|
| 4    | padina | 0   | 24  | 2   | 12  |
| 23   | dycti  | 6   | 11  | 12  | 0   |
| 0    | calvag | 467 | 0   | 71  | 0   |
| 0    | moncav | 0   | 310 | 7   | 12  |
| 0    | leadl  | 35  | 0   | 660 | 1   |
| 0    | milalc | 0   | 0   | 0   | 714 |
| 0    | cliona | 0   | 0   | 0   | 0   |
| 1368 | agaaga | 0   | 0   | 0   | 10  |
| 0    | orbfav | 0   | 1   | 0   | 2   |
| 21   | Total  | 512 | 370 | 759 | 783 |
| 1474 |        |     |     |     |     |

| Class        | Ground Truth (Pixels) |           | Total |
|--------------|-----------------------|-----------|-------|
|              | Agaaga_AA             | Orbfra_AA |       |
| Unclassified | 0                     | 0         | 0     |
| octoc        | 0                     | 0         | 261   |
| filalg       | 1                     | 13        | 783   |
| CCA          | 98                    | 0         | 769   |
| padina       | 11                    | 6         | 885   |
| dycti        | 4                     | 12        | 860   |
| calvag       | 0                     | 0         | 616   |
| moncav       | 30                    | 2         | 444   |
| leadl        | 0                     | 0         | 704   |
| milalc       | 2                     | 0         | 716   |
| cliona       | 1                     | 242       | 2088  |
| agaaga       | 492                   | 32        | 564   |
| orbfav       | 40                    | 1430      | 1531  |
| Total        | 679                   | 1737      | 10221 |

| Class        | Ground Truth (Percent) |           | CCA_AA | Padina_AA |
|--------------|------------------------|-----------|--------|-----------|
|              | Octoc_AA               | FilAlg_AA |        |           |
| Dyctiota_AA  |                        |           |        |           |
| Unclassified | 0.00                   | 0.00      | 0.00   | 0.00      |
| 0.00         |                        |           |        |           |

|        |        |        |        |        |        |
|--------|--------|--------|--------|--------|--------|
| 1.72   | octoc  | 66.46  | 0.00   | 0.00   | 0.25   |
| 2.03   | filalg | 1.54   | 80.28  | 0.00   | 0.00   |
| 0.00   | CCA    | 3.38   | 0.00   | 94.14  | 0.50   |
| 7.11   | padina | 1.54   | 0.00   | 0.00   | 90.35  |
| 52.15  | dycti  | 24.00  | 3.07   | 0.00   | 2.60   |
| 0.00   | calvag | 0.31   | 9.09   | 0.00   | 0.00   |
| 2.03   | moncav | 0.62   | 0.00   | 1.08   | 5.94   |
| 0.00   | leadl  | 2.15   | 0.00   | 0.15   | 0.00   |
| 0.00   | milalc | 0.00   | 0.00   | 0.00   | 0.00   |
| 32.60  | cliona | 0.00   | 6.85   | 0.00   | 0.25   |
| 0.00   | agaaga | 0.00   | 0.00   | 4.63   | 0.00   |
| 2.35   | orbfav | 0.00   | 0.71   | 0.00   | 0.12   |
| 100.00 | Total  | 100.00 | 100.00 | 100.00 | 100.00 |

|       |              | Ground Truth (Percent) |           | Lead_AA | Milalc_AA |
|-------|--------------|------------------------|-----------|---------|-----------|
| Class |              | Calvag_AA              | Moncav_AA |         |           |
| 0.00  | Cliona       |                        |           |         |           |
| 0.00  | Unclassified | 0.00                   | 0.00      | 0.00    | 0.00      |
| 0.00  | octoc        | 0.00                   | 5.68      | 0.00    | 0.00      |
| 3.66  | filalg       | 0.78                   | 0.00      | 0.00    | 0.00      |
| 0.27  | CCA          | 0.00                   | 0.81      | 0.92    | 4.09      |
| 0.27  | padina       | 0.00                   | 6.49      | 0.26    | 1.53      |
| 1.56  | dycti        | 1.17                   | 2.97      | 1.58    | 0.00      |
| 0.00  | calvag       | 91.21                  | 0.00      | 9.35    | 0.00      |
| 0.00  | moncav       | 0.00                   | 83.78     | 0.92    | 1.53      |
| 0.00  | leadl        | 6.84                   | 0.00      | 86.96   | 0.13      |
|       | milalc       | 0.00                   | 0.00      | 0.00    | 91.19     |

|        |        |        |        |        |        |
|--------|--------|--------|--------|--------|--------|
| 0.00   |        |        |        |        |        |
|        | cliona | 0.00   | 0.00   | 0.00   | 0.00   |
| 92.81  |        |        |        |        |        |
|        | agaaga | 0.00   | 0.00   | 0.00   | 1.28   |
| 0.00   |        |        |        |        |        |
|        | orbfav | 0.00   | 0.27   | 0.00   | 0.26   |
| 1.42   |        |        |        |        |        |
|        | Total  | 100.00 | 100.00 | 100.00 | 100.00 |
| 100.00 |        |        |        |        |        |

| Class        | Ground Truth (Percent) |           | Total  |
|--------------|------------------------|-----------|--------|
|              | Agaaga_AA              | Orbfra_AA |        |
| Unclassified | 0.00                   | 0.00      | 0.00   |
| octoc        | 0.00                   | 0.00      | 2.55   |
| filalg       | 0.15                   | 0.75      | 7.66   |
| CCA          | 14.43                  | 0.00      | 7.52   |
| padina       | 1.62                   | 0.35      | 8.66   |
| dycti        | 0.59                   | 0.69      | 8.41   |
| calvag       | 0.00                   | 0.00      | 6.03   |
| moncav       | 4.42                   | 0.12      | 4.34   |
| leadl        | 0.00                   | 0.00      | 6.89   |
| milalc       | 0.29                   | 0.00      | 7.01   |
| cliona       | 0.15                   | 13.93     | 20.43  |
| agaaga       | 72.46                  | 1.84      | 5.52   |
| orbfav       | 5.89                   | 82.33     | 14.98  |
| Total        | 100.00                 | 100.00    | 100.00 |

| Class    | Commission | Omission  | Commission |
|----------|------------|-----------|------------|
| Omission | (Percent)  | (Percent) | (Pixels)   |
| (Pixels) |            |           |            |
| octoc    | 17.24      | 33.54     | 45/261     |
| 109/325  |            |           |            |
| filalg   | 13.15      | 19.72     | 103/783    |
| 167/847  |            |           |            |
| CCA      | 20.68      | 5.86      | 159/769    |
| 38/648   |            |           |            |
| padina   | 17.51      | 9.65      | 155/885    |

|          |       |       |          |
|----------|-------|-------|----------|
| 78/808   |       |       |          |
| dycti    | 22.44 | 47.85 | 193/860  |
| 612/1279 |       |       |          |
| calvag   | 24.19 | 8.79  | 149/616  |
| 45/512   |       |       |          |
| moncav   | 30.18 | 16.22 | 134/444  |
| 60/370   |       |       |          |
| leadl    | 6.25  | 13.04 | 44/704   |
| 99/759   |       |       |          |
| milalc   | 0.28  | 8.81  | 2/716    |
| 69/783   |       |       |          |
| cliona   | 34.48 | 7.19  | 720/2088 |
| 106/1474 |       |       |          |
| agaaga   | 12.77 | 27.54 | 72/564   |
| 187/679  |       |       |          |
| orbfav   | 6.60  | 17.67 | 101/1531 |
| 307/1737 |       |       |          |

| Class     | Prod. Acc. | User Acc. | Prod. Acc. |
|-----------|------------|-----------|------------|
| User Acc. | (Percent)  | (Percent) | (Pixels)   |
| (Pixels)  |            |           |            |
| octoc     | 66.46      | 82.76     | 216/325    |
| 216/261   |            |           |            |
| filalg    | 80.28      | 86.85     | 680/847    |
| 680/783   |            |           |            |
| CCA       | 94.14      | 79.32     | 610/648    |
| 610/769   |            |           |            |
| padina    | 90.35      | 82.49     | 730/808    |
| 730/885   |            |           |            |
| dycti     | 52.15      | 77.56     | 667/1279   |
| 667/860   |            |           |            |
| calvag    | 91.21      | 75.81     | 467/512    |
| 467/616   |            |           |            |
| moncav    | 83.78      | 69.82     | 310/370    |
| 310/444   |            |           |            |
| leadl     | 86.96      | 93.75     | 660/759    |
| 660/704   |            |           |            |
| milalc    | 91.19      | 99.72     | 714/783    |
| 714/716   |            |           |            |
| cliona    | 92.81      | 65.52     | 1368/1474  |
| 1368/2088 |            |           |            |
| agaaga    | 72.46      | 87.23     | 492/679    |
| 492/564   |            |           |            |
| orbfav    | 82.33      | 93.40     | 1430/1737  |
| 1430/1531 |            |           |            |

Table S4. Confusion Matrix subplot BI, 12 class, SVM, RGB subset, Local Sigma Filter

Overall Accuracy = (6867/10221) 67.1852%

Kappa Coefficient = 0.6301

|             |              | Ground Truth (Pixels) |        |           |         |
|-------------|--------------|-----------------------|--------|-----------|---------|
| Class       |              | Agaaga_AA             | Cliona | Calvag_AA | Lead_AA |
| Dyctiota_AA | Unclassified | 0                     | 0      | 0         | 0       |
| 0           | agaaga       | 302                   | 1      | 0         | 10      |
| 0           | cliona       | 1                     | 1381   | 2         | 2       |
| 537         | calvag       | 3                     | 0      | 417       | 70      |
| 2           | leadl        | 30                    | 6      | 23        | 556     |
| 2           | dycti        | 1                     | 14     | 4         | 30      |
| 95          | moncav       | 55                    | 0      | 0         | 15      |
| 0           | milalc       | 4                     | 0      | 0         | 0       |
| 0           | orbfav       | 73                    | 32     | 27        | 54      |
| 602         | padina       | 12                    | 2      | 0         | 3       |
| 21          | CCA          | 198                   | 0      | 0         | 18      |
| 0           | filalg       | 0                     | 38     | 39        | 1       |
| 20          | octoc        | 0                     | 0      | 0         | 0       |
| 0           | Total        | 679                   | 1474   | 512       | 759     |
| 1279        |              |                       |        |           |         |

|        |              | Ground Truth (Pixels) |           |           |           |
|--------|--------------|-----------------------|-----------|-----------|-----------|
| Class  |              | Moncav_AA             | Milalc_AA | Orbfra_AA | Padina_AA |
| CCA_AA | Unclassified | 0                     | 0         | 0         | 0         |
| 0      | agaaga       | 27                    | 7         | 20        | 16        |
| 56     | cliona       | 0                     | 0         | 216       | 3         |
| 0      | calvag       | 0                     | 0         | 14        | 0         |
| 0      |              |                       |           |           |           |

|     |        |     |     |      |     |
|-----|--------|-----|-----|------|-----|
| 19  | leadl  | 0   | 6   | 18   | 6   |
| 0   | dycti  | 2   | 0   | 79   | 8   |
| 4   | moncav | 238 | 11  | 9    | 25  |
| 0   | milalc | 0   | 711 | 0    | 0   |
| 0   | orbfav | 96  | 1   | 1304 | 86  |
| 0   | padina | 7   | 22  | 61   | 664 |
| 569 | CCA    | 0   | 25  | 1    | 0   |
| 0   | filalg | 0   | 0   | 15   | 0   |
| 0   | octoc  | 0   | 0   | 0    | 0   |
| 648 | Total  | 370 | 783 | 1737 | 808 |

| Class        | Ground Truth (Pixels) |          | Total |
|--------------|-----------------------|----------|-------|
|              | FilAlg_AA             | Octoc_AA |       |
| Unclassified | 0                     | 0        | 0     |
| agaaga       | 0                     | 0        | 439   |
| cliona       | 189                   | 61       | 2392  |
| calvag       | 15                    | 0        | 521   |
| leadl        | 2                     | 1        | 669   |
| dycti        | 0                     | 22       | 255   |
| moncav       | 0                     | 0        | 357   |
| milalc       | 0                     | 0        | 715   |
| orbfav       | 11                    | 237      | 2523  |
| padina       | 0                     | 1        | 793   |
| CCA          | 0                     | 0        | 811   |
| filalg       | 630                   | 3        | 746   |
| octoc        | 0                     | 0        | 0     |
| Total        | 847                   | 325      | 10221 |

| Class        | Ground Truth (Percent) |        | Calvag_AA | Lead_AA |
|--------------|------------------------|--------|-----------|---------|
|              | Agaaga_AA              | Cliona |           |         |
| Dyctiota_AA  |                        |        |           |         |
| Unclassified | 0.00                   | 0.00   | 0.00      | 0.00    |
| 0.00         |                        |        |           |         |



|        |        |        |        |        |        |
|--------|--------|--------|--------|--------|--------|
| 0.00   | agaaga | 44.48  | 0.07   | 0.00   | 1.32   |
| 41.99  | cliona | 0.15   | 93.69  | 0.39   | 0.26   |
| 0.16   | calvag | 0.44   | 0.00   | 81.45  | 9.22   |
| 0.16   | leadl  | 4.42   | 0.41   | 4.49   | 73.25  |
| 7.43   | dycti  | 0.15   | 0.95   | 0.78   | 3.95   |
| 0.00   | moncav | 8.10   | 0.00   | 0.00   | 1.98   |
| 0.00   | milalc | 0.59   | 0.00   | 0.00   | 0.00   |
| 47.07  | orbfav | 10.75  | 2.17   | 5.27   | 7.11   |
| 1.64   | padina | 1.77   | 0.14   | 0.00   | 0.40   |
| 0.00   | CCA    | 29.16  | 0.00   | 0.00   | 2.37   |
| 1.56   | filalg | 0.00   | 2.58   | 7.62   | 0.13   |
| 0.00   | octoc  | 0.00   | 0.00   | 0.00   | 0.00   |
| 100.00 | Total  | 100.00 | 100.00 | 100.00 | 100.00 |

|        |              | Ground Truth (Percent) |           | Orbfra_AA | Padina_AA |
|--------|--------------|------------------------|-----------|-----------|-----------|
| Class  |              | Moncav_AA              | Milalc_AA |           |           |
| CCA_AA | Unclassified | 0.00                   | 0.00      | 0.00      | 0.00      |
| 0.00   | agaaga       | 7.30                   | 0.89      | 1.15      | 1.98      |
| 8.64   | cliona       | 0.00                   | 0.00      | 12.44     | 0.37      |
| 0.00   | calvag       | 0.00                   | 0.00      | 0.81      | 0.00      |
| 0.00   | leadl        | 0.00                   | 0.77      | 1.04      | 0.74      |
| 2.93   | dycti        | 0.54                   | 0.00      | 4.55      | 0.99      |
| 0.00   | moncav       | 64.32                  | 1.40      | 0.52      | 3.09      |
| 0.62   | milalc       | 0.00                   | 90.80     | 0.00      | 0.00      |
| 0.00   | orbfav       | 25.95                  | 0.13      | 75.07     | 10.64     |
| 0.00   | padina       | 1.89                   | 2.81      | 3.51      | 82.18     |

|        |        |        |        |        |        |
|--------|--------|--------|--------|--------|--------|
| 0.00   |        |        |        |        |        |
|        | CCA    | 0.00   | 3.19   | 0.06   | 0.00   |
| 87.81  |        |        |        |        |        |
|        | filalg | 0.00   | 0.00   | 0.86   | 0.00   |
| 0.00   |        |        |        |        |        |
|        | octoc  | 0.00   | 0.00   | 0.00   | 0.00   |
| 0.00   |        |        |        |        |        |
|        | Total  | 100.00 | 100.00 | 100.00 | 100.00 |
| 100.00 |        |        |        |        |        |

| Class        | Ground Truth (Percent) |          | Total  |
|--------------|------------------------|----------|--------|
|              | FilAlg_AA              | Octoc_AA |        |
| Unclassified | 0.00                   | 0.00     | 0.00   |
| agaaga       | 0.00                   | 0.00     | 4.30   |
| cliona       | 22.31                  | 18.77    | 23.40  |
| calvag       | 1.77                   | 0.00     | 5.10   |
| leadl        | 0.24                   | 0.31     | 6.55   |
| dycti        | 0.00                   | 6.77     | 2.49   |
| moncav       | 0.00                   | 0.00     | 3.49   |
| milalc       | 0.00                   | 0.00     | 7.00   |
| orbfav       | 1.30                   | 72.92    | 24.68  |
| padina       | 0.00                   | 0.31     | 7.76   |
| CCA          | 0.00                   | 0.00     | 7.93   |
| filalg       | 74.38                  | 0.92     | 7.30   |
| octoc        | 0.00                   | 0.00     | 0.00   |
| Total        | 100.00                 | 100.00   | 100.00 |

| Class    | Commission | Omission  | Commission |
|----------|------------|-----------|------------|
| Omission | (Percent)  | (Percent) | (Pixels)   |
| (Pixels) |            |           |            |
| agaaga   | 31.21      | 55.52     | 137/439    |
| 377/679  |            |           |            |
| cliona   | 42.27      | 6.31      | 1011/2392  |
| 93/1474  |            |           |            |
| calvag   | 19.96      | 18.55     | 104/521    |
| 95/512   |            |           |            |

|           |        |       |        |           |
|-----------|--------|-------|--------|-----------|
| 203/759   | leadl  | 16.89 | 26.75  | 113/669   |
| 1184/1279 | dycti  | 62.75 | 92.57  | 160/255   |
| 132/370   | moncav | 33.33 | 35.68  | 119/357   |
| 72/783    | milalc | 0.56  | 9.20   | 4/715     |
| 433/1737  | orbfav | 48.32 | 24.93  | 1219/2523 |
| 144/808   | padina | 16.27 | 17.82  | 129/793   |
| 79/648    | CCA    | 29.84 | 12.19  | 242/811   |
| 217/847   | filalg | 15.55 | 25.62  | 116/746   |
| 325/325   | octoc  | 0.00  | 100.00 | 0/0       |

| User Acc. | Class  | Prod. Acc.<br>(Percent) | User Acc.<br>(Percent) | Prod. Acc.<br>(Pixels) |
|-----------|--------|-------------------------|------------------------|------------------------|
| 302/439   | agaaga | 44.48                   | 68.79                  | 302/679                |
| 1381/2392 | cliona | 93.69                   | 57.73                  | 1381/1474              |
| 417/521   | calvag | 81.45                   | 80.04                  | 417/512                |
| 556/669   | leadl  | 73.25                   | 83.11                  | 556/759                |
| 95/255    | dycti  | 7.43                    | 37.25                  | 95/1279                |
| 238/357   | moncav | 64.32                   | 66.67                  | 238/370                |
| 711/715   | milalc | 90.80                   | 99.44                  | 711/783                |
| 1304/2523 | orbfav | 75.07                   | 51.68                  | 1304/1737              |
| 664/793   | padina | 82.18                   | 83.73                  | 664/808                |
| 569/811   | CCA    | 87.81                   | 70.16                  | 569/648                |
| 630/746   | filalg | 74.38                   | 84.45                  | 630/847                |
| 0/0       | octoc  | 0.00                    | 0.00                   | 0/325                  |

Table S5. Confusion Matrix subplot BI, 12 class, MaxLike, Local Sigma Filter, Majority Analysis

Overall Accuracy = (8624/10221) 84.3753%

Kappa Coefficient = 0.8263

|           |              | Ground Truth (Pixels) |           |          |           |
|-----------|--------------|-----------------------|-----------|----------|-----------|
| Class     |              | Padina_AA             | Orbfra_AA | Octoc_AA | Moncav_AA |
| Milalc_AA | Unclassified | 0                     | 0         | 0        | 0         |
| 0         | padina       | 677                   | 7         | 0        | 2         |
| 5         | orbfav       | 0                     | 1459      | 0        | 0         |
| 0         | octoc        | 6                     | 0         | 278      | 27        |
| 0         | moncav       | 97                    | 3         | 0        | 333       |
| 9         | milalc       | 0                     | 0         | 0        | 0         |
| 725       | leadl        | 0                     | 0         | 0        | 0         |
| 0         | filalg       | 0                     | 22        | 3        | 0         |
| 0         | dycti        | 15                    | 21        | 39       | 4         |
| 0         | cliona       | 0                     | 178       | 0        | 0         |
| 0         | CCA          | 13                    | 1         | 5        | 4         |
| 39        | calvag       | 0                     | 0         | 0        | 0         |
| 0         | agaaga       | 0                     | 46        | 0        | 0         |
| 5         | Total        | 808                   | 1737      | 325      | 370       |
| 783       |              |                       |           |          |           |

|        |              | Ground Truth (Pixels) |           |             |        |
|--------|--------------|-----------------------|-----------|-------------|--------|
| Class  |              | Lead_AA               | FilAlg_AA | Dyctiota_AA | Cliona |
| CCA_AA | Unclassified | 0                     | 0         | 0           | 0      |
| 0      | padina       | 0                     | 0         | 60          | 2      |
| 0      | orbfav       | 0                     | 2         | 30          | 25     |
| 0      | octoc        | 0                     | 0         | 19          | 0      |
| 0      |              |                       |           |             |        |

|     |        |     |     |      |      |
|-----|--------|-----|-----|------|------|
| 7   | moncav | 1   | 0   | 63   | 5    |
| 0   | milalc | 0   | 0   | 0    | 0    |
| 0   | leadl  | 673 | 0   | 0    | 0    |
| 0   | filalg | 0   | 772 | 53   | 71   |
| 0   | dycti  | 0   | 53  | 859  | 101  |
| 0   | cliona | 0   | 6   | 188  | 1265 |
| 614 | CCA    | 31  | 8   | 7    | 5    |
| 0   | calvag | 54  | 6   | 0    | 0    |
| 27  | agaaga | 0   | 0   | 0    | 0    |
| 648 | Total  | 759 | 847 | 1279 | 1474 |

| Class        | Ground Truth (Pixels) |           | Total |
|--------------|-----------------------|-----------|-------|
|              | Calvag_AA             | Agaaga_AA |       |
| Unclassified | 0                     | 0         | 0     |
| padina       | 0                     | 4         | 757   |
| orbfav       | 0                     | 20        | 1536  |
| octoc        | 2                     | 0         | 332   |
| moncav       | 1                     | 31        | 550   |
| milalc       | 0                     | 3         | 728   |
| leadl        | 22                    | 0         | 695   |
| filalg       | 7                     | 0         | 928   |
| dycti        | 0                     | 6         | 1098  |
| cliona       | 0                     | 0         | 1637  |
| CCA          | 0                     | 126       | 853   |
| calvag       | 480                   | 0         | 540   |
| agaaga       | 0                     | 489       | 567   |
| Total        | 512                   | 679       | 10221 |

| Class     | Ground Truth (Percent) |           | Octoc_AA | Moncav_AA |
|-----------|------------------------|-----------|----------|-----------|
|           | Padina_AA              | Orbfra_AA |          |           |
| Milalc_AA |                        |           |          |           |
| 0.00      | 0.00                   | 0.00      | 0.00     | 0.00      |
| padina    | 83.79                  | 0.40      | 0.00     | 0.54      |

|        |        |        |        |        |        |
|--------|--------|--------|--------|--------|--------|
| 0.64   |        |        |        |        |        |
|        | orbfav | 0.00   | 84.00  | 0.00   | 0.00   |
| 0.00   |        |        |        |        |        |
|        | octoc  | 0.74   | 0.00   | 85.54  | 7.30   |
| 0.00   |        |        |        |        |        |
|        | moncav | 12.00  | 0.17   | 0.00   | 90.00  |
| 1.15   |        |        |        |        |        |
|        | milalc | 0.00   | 0.00   | 0.00   | 0.00   |
| 92.59  |        |        |        |        |        |
|        | leadl  | 0.00   | 0.00   | 0.00   | 0.00   |
| 0.00   |        |        |        |        |        |
|        | filalg | 0.00   | 1.27   | 0.92   | 0.00   |
| 0.00   |        |        |        |        |        |
|        | dycti  | 1.86   | 1.21   | 12.00  | 1.08   |
| 0.00   |        |        |        |        |        |
|        | cliona | 0.00   | 10.25  | 0.00   | 0.00   |
| 0.00   |        |        |        |        |        |
|        | CCA    | 1.61   | 0.06   | 1.54   | 1.08   |
| 4.98   |        |        |        |        |        |
|        | calvag | 0.00   | 0.00   | 0.00   | 0.00   |
| 0.00   |        |        |        |        |        |
|        | agaaga | 0.00   | 2.65   | 0.00   | 0.00   |
| 0.64   |        |        |        |        |        |
|        | Total  | 100.00 | 100.00 | 100.00 | 100.00 |
| 100.00 |        |        |        |        |        |

|              |        | Ground Truth (Percent) |           |             |        |
|--------------|--------|------------------------|-----------|-------------|--------|
| Class        |        | Lead_AA                | FilAlg_AA | Dyctiota_AA | Cliona |
| CCA_AA       |        |                        |           |             |        |
| Unclassified |        | 0.00                   | 0.00      | 0.00        | 0.00   |
| 0.00         |        |                        |           |             |        |
|              | padina | 0.00                   | 0.00      | 4.69        | 0.14   |
| 0.00         |        |                        |           |             |        |
|              | orbfav | 0.00                   | 0.24      | 2.35        | 1.70   |
| 0.00         |        |                        |           |             |        |
|              | octoc  | 0.00                   | 0.00      | 1.49        | 0.00   |
| 0.00         |        |                        |           |             |        |
|              | moncav | 0.13                   | 0.00      | 4.93        | 0.34   |
| 1.08         |        |                        |           |             |        |
|              | milalc | 0.00                   | 0.00      | 0.00        | 0.00   |
| 0.00         |        |                        |           |             |        |
|              | leadl  | 88.67                  | 0.00      | 0.00        | 0.00   |
| 0.00         |        |                        |           |             |        |
|              | filalg | 0.00                   | 91.15     | 4.14        | 4.82   |
| 0.00         |        |                        |           |             |        |
|              | dycti  | 0.00                   | 6.26      | 67.16       | 6.85   |
| 0.00         |        |                        |           |             |        |
|              | cliona | 0.00                   | 0.71      | 14.70       | 85.82  |
| 0.00         |        |                        |           |             |        |

|        |        |        |        |        |        |
|--------|--------|--------|--------|--------|--------|
| 94.75  | CCA    | 4.08   | 0.94   | 0.55   | 0.34   |
| 0.00   | calvag | 7.11   | 0.71   | 0.00   | 0.00   |
| 4.17   | agaaga | 0.00   | 0.00   | 0.00   | 0.00   |
| 100.00 | Total  | 100.00 | 100.00 | 100.00 | 100.00 |

| Class        | Ground Truth (Percent) |           | Total  |
|--------------|------------------------|-----------|--------|
|              | Calvag_AA              | Agaaga_AA |        |
| Unclassified | 0.00                   | 0.00      | 0.00   |
| padina       | 0.00                   | 0.59      | 7.41   |
| orbfav       | 0.00                   | 2.95      | 15.03  |
| octoc        | 0.39                   | 0.00      | 3.25   |
| moncav       | 0.20                   | 4.57      | 5.38   |
| milalc       | 0.00                   | 0.44      | 7.12   |
| leadl        | 4.30                   | 0.00      | 6.80   |
| filalg       | 1.37                   | 0.00      | 9.08   |
| dycti        | 0.00                   | 0.88      | 10.74  |
| cliona       | 0.00                   | 0.00      | 16.02  |
| CCA          | 0.00                   | 18.56     | 8.35   |
| calvag       | 93.75                  | 0.00      | 5.28   |
| agaaga       | 0.00                   | 72.02     | 5.55   |
| Total        | 100.00                 | 100.00    | 100.00 |

| Class    | Commission | Omission  | Commission |
|----------|------------|-----------|------------|
| (Pixels) | (Percent)  | (Percent) | (Pixels)   |
| padina   | 10.57      | 16.21     | 80/757     |
| 131/808  |            |           |            |
| orbfav   | 5.01       | 16.00     | 77/1536    |
| 278/1737 |            |           |            |
| octoc    | 16.27      | 14.46     | 54/332     |
| 47/325   |            |           |            |
| moncav   | 39.45      | 10.00     | 217/550    |
| 37/370   |            |           |            |

|          |        |       |       |          |
|----------|--------|-------|-------|----------|
| 58/783   | milalc | 0.41  | 7.41  | 3/728    |
| 86/759   | leadl  | 3.17  | 11.33 | 22/695   |
| 75/847   | filalg | 16.81 | 8.85  | 156/928  |
| 420/1279 | dycti  | 21.77 | 32.84 | 239/1098 |
| 209/1474 | cliona | 22.72 | 14.18 | 372/1637 |
| 34/648   | CCA    | 28.02 | 5.25  | 239/853  |
| 32/512   | calvag | 11.11 | 6.25  | 60/540   |
| 190/679  | agaaga | 13.76 | 27.98 | 78/567   |

| User Acc. | Class  | Prod. Acc.<br>(Percent) | User Acc.<br>(Percent) | Prod. Acc.<br>(Pixels) |
|-----------|--------|-------------------------|------------------------|------------------------|
| 677/757   | padina | 83.79                   | 89.43                  | 677/808                |
| 1459/1536 | orbfav | 84.00                   | 94.99                  | 1459/1737              |
| 278/332   | octoc  | 85.54                   | 83.73                  | 278/325                |
| 333/550   | moncav | 90.00                   | 60.55                  | 333/370                |
| 725/728   | milalc | 92.59                   | 99.59                  | 725/783                |
| 673/695   | leadl  | 88.67                   | 96.83                  | 673/759                |
| 772/928   | filalg | 91.15                   | 83.19                  | 772/847                |
| 859/1098  | dycti  | 67.16                   | 78.23                  | 859/1279               |
| 1265/1637 | cliona | 85.82                   | 77.28                  | 1265/1474              |
| 614/853   | CCA    | 94.75                   | 71.98                  | 614/648                |
| 480/540   | calvag | 93.75                   | 88.89                  | 480/512                |
| 489/567   | agaaga | 72.02                   | 86.24                  | 489/679                |



Table S6. Subplot BII, 9 classes ROI separation values (Jeffries-Matusita, Transformed Divergence)

agaaga2:

Filamv3: (1.99650535 1.99991131)  
 CCAv3: (1.99967819 2.00000000)  
 Clionav3: (1.99998816 1.99999999)  
 Dyctv3: (1.83474091 1.92191484)  
 Padina: (1.92396563 1.96845026)  
 Spng1: (1.99999778 2.00000000)  
 Spng2v3: (1.99949993 2.00000000)  
 Zoanth: (1.99643320 1.99999934)

Filamv3:

agaaga2: (1.99650535 1.99991131)  
 CCAv3: (1.99999167 2.00000000)  
 Clionav3: (1.79050050 1.98518317)  
 Dyctv3: (1.96568376 1.98562234)  
 Padina: (1.99969278 2.00000000)  
 Spng1: (1.99998944 1.99999956)  
 Spng2v3: (1.19460563 1.42873367)  
 Zoanth: (1.99997480 2.00000000)

CCA3v:

agaaga2: (1.99967819 2.00000000)  
 Filamv3: (1.99999167 2.00000000)  
 Clionav3: (1.99999161 2.00000000)  
 Dyctv3: (1.99998543 2.00000000)  
 Padina: (1.99964878 1.99999980)  
 Spng1: (1.99877963 2.00000000)  
 Spng2v3: (1.99999692 2.00000000)  
 Zoanth: (1.45388625 1.70966172)

Clionav3:

agaaga2: (1.99998816 1.99999999)  
 Filamv3: (1.79050050 1.98518317)  
 CCAv3: (1.99999161 2.00000000)  
 Dyctv3: (1.88519548 1.96624525)  
 Padina: (1.99796355 2.00000000)  
 Spng1: (1.99999985 2.00000000)  
 Spng2v3: (1.95644123 1.99999999)  
 Zoanth: (1.99999989 2.00000000)

Dyctv3:

agaaga2: (1.83474091 1.92191484)  
 Filamv3: (1.96568376 1.98562234)  
 CCAv3: (1.99998543 2.00000000)  
 Clionav3: (1.88519548 1.96624525)  
 Padina: (1.95773435 1.99833464)  
 Spng1: (2.00000000 2.00000000)

Spng2v3: (1.99567695 1.99999252)  
Zoanth: (1.99993849 2.00000000)

Padina:

agaaga2: (1.92396563 1.96845026)  
Filamv3: (1.99969278 2.00000000)  
CCAv3: (1.99964878 1.99999980)  
Clionav3: (1.99796355 2.00000000)  
Dyctv3: (1.95773435 1.99833464)  
Spng1: (1.99999920 2.00000000)  
Spng2v3: (1.99992437 2.00000000)  
Zoanth: (1.98934963 1.99978519)

Spng1:

agaaga2: (1.99999778 2.00000000)  
Filamv3: (1.99998944 1.99999956)  
CCAv3: (1.99877963 2.00000000)  
Clionav3: (1.99999985 2.00000000)  
Dyctv3: (2.00000000 2.00000000)  
Padina: (1.99999920 2.00000000)  
Spng2v3: (1.99999986 2.00000000)  
Zoanth: (1.99997980 2.00000000)

Spng2v3:

agaaga2: (1.99949993 2.00000000)  
Filamv3: (1.19460563 1.42873367)  
CCAv3: (1.99999692 2.00000000)  
Clionav3: (1.95644123 1.99999999)  
Dyctv3: (1.99567695 1.99999252)  
Padina: (1.99992437 2.00000000)  
Spng1: (1.99999986 2.00000000)  
Zoanth: (1.99999362 2.00000000)

Zoanth:

agaaga2: (1.99643320 1.99999934)  
Filamv3: (1.99997480 2.00000000)  
CCAv3: (1.45388625 1.70966172)  
Clionav3: (1.99999989 2.00000000)  
Dyctv3: (1.99993849 2.00000000)  
Padina: (1.98934963 1.99978519)  
Spng1: (1.99997980 2.00000000)  
Spng2v3: (1.99999362 2.00000000)

Pair Separation (least to most);

Filamv3 and Spng2v3 – 1.19460563  
CCAv3 and Zoanth – 1.45388625  
Filamv3 and Clionav3 – 1.79050050  
agaaga2 and Dyctv3 – 1.83474091

Clionav3 and Dyctv3 – 1.88519548  
agaaga2 and Padina – 1.92396563  
Clionav3 and Spng2v3 – 1.95644123  
Dyctv3 and Padina – 1.95773435  
Filamv3 and Dyctv3 – 1.96568376  
Padina and Zoanth – 1.98934963  
Dyctv3 and Spng2v3 – 1.99567695  
agaaga2 and Zoanth – 1.99643320  
agaaga2 and Filamv3 – 1.99650535  
Clionav3 and Padina – 1.99796355  
CCAv3 and Spng1 – 1.99877963  
agaaga2 and Spng2v3 – 1.99949993  
CCAv3 and Padina – 1.99964878  
agaaga2 and CCAv3 – 1.99967819  
Filamv3 and Padina – 1.99969278  
Padina and Spng2v3 – 1.99992437  
Dyctv3 and Zoanth – 1.99993849  
Filamv3 and Zoanth – 1.99997480  
Spng1 and Zoanth – 1.99997980  
CCAv3 and Dyctv3 – 1.99998543  
agaaga2 and Clionav3 – 1.99998816  
Filamv3 and Spng1 – 1.99998944  
CCAv3 and Clionav3 – 1.99999161  
Filamv3 and CCAv3 – 1.99999167  
Spng2v3 and Zoanth – 1.99999362  
CCAv3 and Spng2v3 – 1.99999692  
agaaga2 and Spng1 – 1.99999778  
Padina and Spng1 – 1.99999920  
Clionav3 and Spng1 – 1.99999985  
Spng1 and Spng2v3 – 1.99999986  
Clionav3 and Zoanth – 1.99999989  
Dyctv3 and Spng1 – 2.00000000

Table S7. Confusion Matrix subplot BII, 9 class, MaxLike, Local Sigma Filter

Overall Accuracy = (4533/6270) 72.2967%

Kappa Coefficient = 0.6750

|              |          | Ground Truth (Pixels) |            |          |           |
|--------------|----------|-----------------------|------------|----------|-----------|
| Class        |          | Dyctiota_AA           | Spng2v3_AA | Spng1_AA | Padina_AA |
| FilamA_AA    |          |                       |            |          |           |
| Unclassified |          | 0                     | 0          | 0        | 0         |
| 0            |          |                       |            |          |           |
|              | Dyctv3   | 312                   | 0          | 0        | 1         |
| 70           |          |                       |            |          |           |
|              | Spng2v3  | 0                     | 130        | 0        | 0         |
| 11           |          |                       |            |          |           |
|              | Spng1    | 0                     | 0          | 132      | 0         |
| 3            |          |                       |            |          |           |
|              | Padina   | 66                    | 0          | 0        | 907       |
| 32           |          |                       |            |          |           |
|              | Filamv3  | 14                    | 30         | 11       | 0         |
| 358          |          |                       |            |          |           |
|              | CCAv3    | 0                     | 0          | 1        | 0         |
| 43           |          |                       |            |          |           |
|              | Clionav3 | 1                     | 0          | 0        | 0         |
| 258          |          |                       |            |          |           |
|              | Zoanth   | 0                     | 0          | 0        | 0         |
| 0            |          |                       |            |          |           |
|              | agaaga2  | 44                    | 0          | 0        | 7         |
| 18           |          |                       |            |          |           |
|              | Total    | 437                   | 160        | 144      | 915       |
| 793          |          |                       |            |          |           |

|              |         | Ground Truth (Pixels) |           |           |           |
|--------------|---------|-----------------------|-----------|-----------|-----------|
| Class        |         | CCA_AA                | Cliona_AA | Zoanth_AA | Agaaga_AA |
| Total        |         |                       |           |           |           |
| Unclassified |         | 0                     | 0         | 0         | 0         |
| 0            |         |                       |           |           |           |
|              | Dyctv3  | 11                    | 14        | 2         | 4         |
| 414          |         |                       |           |           |           |
|              | Spng2v3 | 1                     | 2         | 0         | 0         |
| 144          |         |                       |           |           |           |
|              | Spng1   | 1                     | 0         | 0         | 0         |
| 136          |         |                       |           |           |           |
|              | Padina  | 179                   | 8         | 11        | 23        |
| 1226         |         |                       |           |           |           |
|              | Filamv3 | 95                    | 10        | 8         | 0         |
| 526          |         |                       |           |           |           |
|              | CCAv3   | 261                   | 1         | 94        | 1         |
| 401          |         |                       |           |           |           |

|      |          |      |      |      |     |
|------|----------|------|------|------|-----|
| 1530 | Clionav3 | 3    | 1268 | 0    | 0   |
| 1296 | Zoanth   | 295  | 0    | 970  | 31  |
| 597  | agaaga2  | 318  | 0    | 15   | 195 |
| 6270 | Total    | 1164 | 1303 | 1100 | 254 |

|        |                           | Ground Truth (Percent) |            | Spng1_AA | Padina_AA |
|--------|---------------------------|------------------------|------------|----------|-----------|
| Class  |                           | Dyctiota_AA            | Spng2v3_AA |          |           |
| 0.00   | FilamA_AA<br>Unclassified | 0.00                   | 0.00       | 0.00     | 0.00      |
| 8.83   | Dyctv3                    | 71.40                  | 0.00       | 0.00     | 0.11      |
| 1.39   | Spng2v3                   | 0.00                   | 81.25      | 0.00     | 0.00      |
| 0.38   | Spng1                     | 0.00                   | 0.00       | 91.67    | 0.00      |
| 4.04   | Padina                    | 15.10                  | 0.00       | 0.00     | 99.13     |
| 45.15  | Filamv3                   | 3.20                   | 18.75      | 7.64     | 0.00      |
| 5.42   | CCAv3                     | 0.00                   | 0.00       | 0.69     | 0.00      |
| 32.53  | Clionav3                  | 0.23                   | 0.00       | 0.00     | 0.00      |
| 0.00   | Zoanth                    | 0.00                   | 0.00       | 0.00     | 0.00      |
| 2.27   | agaaga2                   | 10.07                  | 0.00       | 0.00     | 0.77      |
| 100.00 | Total                     | 100.00                 | 100.00     | 100.00   | 100.00    |

|       |                       | Ground Truth (Percent) |           | Zoanth_AA | Agaaga_AA |
|-------|-----------------------|------------------------|-----------|-----------|-----------|
| Class |                       | CCA_AA                 | Cliona_AA |           |           |
| 0.00  | Total<br>Unclassified | 0.00                   | 0.00      | 0.00      | 0.00      |
| 6.60  | Dyctv3                | 0.95                   | 1.07      | 0.18      | 1.57      |
| 2.30  | Spng2v3               | 0.09                   | 0.15      | 0.00      | 0.00      |
| 2.17  | Spng1                 | 0.09                   | 0.00      | 0.00      | 0.00      |
| 19.55 | Padina                | 15.38                  | 0.61      | 1.00      | 9.06      |

|        |          |        |        |        |        |
|--------|----------|--------|--------|--------|--------|
| 8.39   | Filamv3  | 8.16   | 0.77   | 0.73   | 0.00   |
| 6.40   | CCAv3    | 22.42  | 0.08   | 8.55   | 0.39   |
| 24.40  | Clionav3 | 0.26   | 97.31  | 0.00   | 0.00   |
| 20.67  | Zoanth   | 25.34  | 0.00   | 88.18  | 12.20  |
| 9.52   | agaaga2  | 27.32  | 0.00   | 1.36   | 76.77  |
| 100.00 | Total    | 100.00 | 100.00 | 100.00 | 100.00 |

| Class    | Commission | Omission  | Commission |
|----------|------------|-----------|------------|
| Omission | (Percent)  | (Percent) | (Pixels)   |
| (Pixels) |            |           |            |
| Dyctv3   | 24.64      | 28.60     | 102/414    |
| 125/437  |            |           |            |
| Spng2v3  | 9.72       | 18.75     | 14/144     |
| 30/160   |            |           |            |
| Spng1    | 2.94       | 8.33      | 4/136      |
| 12/144   |            |           |            |
| Padina   | 26.02      | 0.87      | 319/1226   |
| 8/915    |            |           |            |
| Filamv3  | 31.94      | 54.85     | 168/526    |
| 435/793  |            |           |            |
| CCAv3    | 34.91      | 77.58     | 140/401    |
| 903/1164 |            |           |            |
| Clionav3 | 17.12      | 2.69      | 262/1530   |
| 35/1303  |            |           |            |
| Zoanth   | 25.15      | 11.82     | 326/1296   |
| 130/1100 |            |           |            |
| agaaga2  | 67.34      | 23.23     | 402/597    |
| 59/254   |            |           |            |

| Class     | Prod. Acc. | User Acc. | Prod. Acc. |
|-----------|------------|-----------|------------|
| User Acc. | (Percent)  | (Percent) | (Pixels)   |
| (Pixels)  |            |           |            |
| Dyctv3    | 71.40      | 75.36     | 312/437    |
| 312/414   |            |           |            |
| Spng2v3   | 81.25      | 90.28     | 130/160    |
| 130/144   |            |           |            |
| Spng1     | 91.67      | 97.06     | 132/144    |
| 132/136   |            |           |            |
| Padina    | 99.13      | 73.98     | 907/915    |

|           |       |       |           |
|-----------|-------|-------|-----------|
| 907/1226  |       |       |           |
| Filamv3   | 45.15 | 68.06 | 358/793   |
| 358/526   |       |       |           |
| CCAv3     | 22.42 | 65.09 | 261/1164  |
| 261/401   |       |       |           |
| Clionav3  | 97.31 | 82.88 | 1268/1303 |
| 1268/1530 |       |       |           |
| Zoanth    | 88.18 | 74.85 | 970/1100  |
| 970/1296  |       |       |           |
| agaaga2   | 76.77 | 32.66 | 195/254   |
| 195/597   |       |       |           |

Table S8. Confusion Matrix subplot BII, 9 class, MaxLike, Local Sigma Filter, Majority Analysis

Overall Accuracy = (4630/6270) 73.8437%

Kappa Coefficient = 0.6930

|       |              | Ground Truth (Pixels) |           |           |        |
|-------|--------------|-----------------------|-----------|-----------|--------|
| Class |              | Agaaga_AA             | Zoanth_AA | Cliona_AA | CCA_AA |
| 0     | FilamA_AA    |                       |           |           |        |
|       | Unclassified | 0                     | 0         | 0         | 0      |
| 20    | agaaga2      | 199                   | 12        | 0         | 321    |
|       | Zoanth       | 35                    | 999       | 0         | 280    |
| 262   | Clionav3     | 0                     | 0         | 1289      | 1      |
|       | CCAv3        | 0                     | 70        | 1         | 273    |
| 362   | Filamv3      | 0                     | 9         | 3         | 95     |
|       | Padina       | 17                    | 9         | 7         | 182    |
| 2     | Spng1        | 0                     | 0         | 0         | 0      |
|       | Spng2v3      | 0                     | 0         | 0         | 1      |
| 66    | Dyctv3       | 3                     | 1         | 3         | 11     |
|       | Total        | 254                   | 1100      | 1303      | 1164   |

|       |              | Ground Truth (Pixels) |          |            |             |
|-------|--------------|-----------------------|----------|------------|-------------|
| Class |              | Padina_AA             | Spng1_AA | Spng2v3_AA | Dyctiota_AA |
| 0     | Total        |                       |          |            |             |
|       | Unclassified | 0                     | 0        | 0          | 0           |
| 596   | agaaga2      | 0                     | 0        | 0          | 44          |
|       | Zoanth       | 0                     | 0        | 0          | 0           |
| 1553  | Clionav3     | 0                     | 0        | 0          | 1           |
|       | CCAv3        | 0                     | 0        | 0          | 0           |
| 523   | Filamv3      | 0                     | 11       | 32         | 11          |
|       | Padina       | 915                   | 0        | 0          | 49          |



|      |         |     |     |     |     |
|------|---------|-----|-----|-----|-----|
| 135  | Spng1   | 0   | 133 | 0   | 0   |
| 137  | Spng2v3 | 0   | 0   | 128 | 0   |
| 416  | Dyctv3  | 0   | 0   | 0   | 332 |
| 6270 | Total   | 915 | 144 | 160 | 437 |

|        |              | Ground Truth (Percent) |           |           |        |
|--------|--------------|------------------------|-----------|-----------|--------|
| Class  |              | Agaaga_AA              | Zoanth_AA | Cliona_AA | CCA_AA |
| 0.00   | FilamA_AA    |                        |           |           |        |
| 0.00   | Unclassified | 0.00                   | 0.00      | 0.00      | 0.00   |
| 2.52   | agaaga2      | 78.35                  | 1.09      | 0.00      | 27.58  |
| 0.00   | Zoanth       | 13.78                  | 90.82     | 0.00      | 24.05  |
| 33.04  | Clionav3     | 0.00                   | 0.00      | 98.93     | 0.09   |
| 5.55   | CCAv3        | 0.00                   | 6.36      | 0.08      | 23.45  |
| 45.65  | Filamv3      | 0.00                   | 0.82      | 0.23      | 8.16   |
| 3.66   | Padina       | 6.69                   | 0.82      | 0.54      | 15.64  |
| 0.25   | Spng1        | 0.00                   | 0.00      | 0.00      | 0.00   |
| 1.01   | Spng2v3      | 0.00                   | 0.00      | 0.00      | 0.09   |
| 8.32   | Dyctv3       | 1.18                   | 0.09      | 0.23      | 0.95   |
| 100.00 | Total        | 100.00                 | 100.00    | 100.00    | 100.00 |

|       |              | Ground Truth (Percent) |          |            |             |
|-------|--------------|------------------------|----------|------------|-------------|
| Class |              | Padina_AA              | Spng1_AA | Spng2v3_AA | Dyctiota_AA |
| 0.00  | Total        |                        |          |            |             |
| 0.00  | Unclassified | 0.00                   | 0.00     | 0.00       | 0.00        |
| 9.51  | agaaga2      | 0.00                   | 0.00     | 0.00       | 10.07       |
| 20.96 | Zoanth       | 0.00                   | 0.00     | 0.00       | 0.00        |
| 24.77 | Clionav3     | 0.00                   | 0.00     | 0.00       | 0.23        |
| 6.19  | CCAv3        | 0.00                   | 0.00     | 0.00       | 0.00        |

|        |         |        |        |        |        |
|--------|---------|--------|--------|--------|--------|
| 8.34   | Filamv3 | 0.00   | 7.64   | 20.00  | 2.52   |
| 19.27  | Padina  | 100.00 | 0.00   | 0.00   | 11.21  |
| 2.15   | Spng1   | 0.00   | 92.36  | 0.00   | 0.00   |
| 2.19   | Spng2v3 | 0.00   | 0.00   | 80.00  | 0.00   |
| 6.63   | Dyctv3  | 0.00   | 0.00   | 0.00   | 75.97  |
| 100.00 | Total   | 100.00 | 100.00 | 100.00 | 100.00 |

| Class    | Commission | Omission  | Commission |
|----------|------------|-----------|------------|
| Omission | (Percent)  | (Percent) | (Pixels)   |
| (Pixels) |            |           |            |
| agaaga2  | 66.61      | 21.65     | 397/596    |
| 55/254   |            |           |            |
| Zoanth   | 23.97      | 9.18      | 315/1314   |
| 101/1100 |            |           |            |
| Clionav3 | 17.00      | 1.07      | 264/1553   |
| 14/1303  |            |           |            |
| CCAv3    | 29.64      | 76.55     | 115/388    |
| 891/1164 |            |           |            |
| Filamv3  | 30.78      | 54.35     | 161/523    |
| 431/793  |            |           |            |
| Padina   | 24.25      | 0.00      | 293/1208   |
| 0/915    |            |           |            |
| Spng1    | 1.48       | 7.64      | 2/135      |
| 11/144   |            |           |            |
| Spng2v3  | 6.57       | 20.00     | 9/137      |
| 32/160   |            |           |            |
| Dyctv3   | 20.19      | 24.03     | 84/416     |
| 105/437  |            |           |            |

| Class     | Prod. Acc. | User Acc. | Prod. Acc. |
|-----------|------------|-----------|------------|
| User Acc. | (Percent)  | (Percent) | (Pixels)   |
| (Pixels)  |            |           |            |
| agaaga2   | 78.35      | 33.39     | 199/254    |
| 199/596   |            |           |            |
| Zoanth    | 90.82      | 76.03     | 999/1100   |
| 999/1314  |            |           |            |
| Clionav3  | 98.93      | 83.00     | 1289/1303  |
| 1289/1553 |            |           |            |
| CCAv3     | 23.45      | 70.36     | 273/1164   |

|          |        |       |         |
|----------|--------|-------|---------|
| 273/388  |        |       |         |
| Filamv3  | 45.65  | 69.22 | 362/793 |
| 362/523  |        |       |         |
| Padina   | 100.00 | 75.75 | 915/915 |
| 915/1208 |        |       |         |
| Spng1    | 92.36  | 98.52 | 133/144 |
| 133/135  |        |       |         |
| Spng2v3  | 80.00  | 93.43 | 128/160 |
| 128/137  |        |       |         |
| Dyctv3   | 75.97  | 79.81 | 332/437 |
| 332/416  |        |       |         |

Table S9. Subplot B Full, 14 classes ROI separation values (Jeffries-Matusita, Transformed Divergence)

Lead [Red] 650 points:

Orbfra [Blue] 1100 points: (1.99999889 2.00000000)  
 Zoanth [Cyan] 650 points: (1.95484797 1.99734110)  
 Cliona [Maroon] 1101 points: (1.99999548 2.00000000)  
 Milalc\_AA [Coral] 451 points: (1.97717070 2.00000000)  
 Myali [Aquamarine] 309 points: (1.99999955 2.00000000)  
 Sidsid [Sienna] 325 points: (1.97973368 1.99990356)  
 Pordiv [Thistle] 395 points: (1.99865262 2.00000000)  
 Moncav [Red2] 314 points: (1.99679017 1.99999891)  
 Padina [Green1] 1000 points: (1.99847798 1.99998926)  
 Dyctiota [Green3] 1000 points: (1.99909193 1.99999999)  
 AlFilam [Blue2] 603 points: (1.99860531 1.99999749)  
 CCA [Yellow1] 822 points: (1.95424889 1.99999686)  
 Steint [Yellow3] 253 points: (1.99657462 1.99991640)

Orbfra [Blue] 1100 points:

Lead [Red] 650 points: (1.99999889 2.00000000)  
 Zoanth [Cyan] 650 points: (1.99975775 2.00000000)  
 Cliona [Maroon] 1101 points: (1.98113921 1.99999722)  
 Milalc\_AA [Coral] 451 points: (1.99953831 2.00000000)  
 Myali [Aquamarine] 309 points: (1.94434563 1.99730445)  
 Sidsid [Sienna] 325 points: (1.99999962 2.00000000)  
 Pordiv [Thistle] 395 points: (1.91968119 1.98201111)  
 Moncav [Red2] 314 points: (1.99509642 1.99999997)  
 Padina [Green1] 1000 points: (1.99510335 1.99981068)  
 Dyctiota [Green3] 1000 points: (1.89269265 1.94038679)  
 AlFilam [Blue2] 603 points: (1.97326699 1.99909584)  
 CCA [Yellow1] 822 points: (1.99959382 2.00000000)  
 Steint [Yellow3] 253 points: (1.99955367 2.00000000)

Zoanth [Cyan] 650 points:

Lead [Red] 650 points: (1.95484797 1.99734110)  
 Orbfra [Blue] 1100 points: (1.99975775 2.00000000)  
 Cliona [Maroon] 1101 points: (1.99633866 2.00000000)  
 Milalc\_AA [Coral] 451 points: (1.80576735 1.99938901)  
 Myali [Aquamarine] 309 points: (1.99418043 1.99956544)  
 Sidsid [Sienna] 325 points: (0.98233410 1.11762266)  
 Pordiv [Thistle] 395 points: (1.83163038 1.95052898)  
 Moncav [Red2] 314 points: (1.91622578 1.99983876)  
 Padina [Green1] 1000 points: (1.84555313 1.99883684)  
 Dyctiota [Green3] 1000 points: (1.97361589 1.99995263)  
 AlFilam [Blue2] 603 points: (1.98929131 1.99999581)  
 CCA [Yellow1] 822 points: (1.51907933 1.82457268)  
 Steint [Yellow3] 253 points: (1.75436209 1.99383273)

Cliona [Maroon] 1101 points:

Lead [Red] 650 points: (1.99999548 2.00000000)

Orbfra [Blue] 1100 points: (1.98113921 1.99999722)  
Zoanth [Cyan] 650 points: (1.99633866 2.00000000)  
Milalc\_AA [Coral] 451 points: (1.99572956 2.00000000)  
Myali [Aquamarine] 309 points: (1.99722132 1.99986978)  
Sidsid [Sienna] 325 points: (1.99999965 2.00000000)  
Pordiv [Thistle] 395 points: (1.91233009 1.99993315)  
Moncav [Red2] 314 points: (1.72171064 1.90187763)  
Padina [Green1] 1000 points: (1.95551053 1.99747456)  
Dyctiota [Green3] 1000 points: (1.16940873 1.44977836)  
AlFilam [Blue2] 603 points: (1.82619579 1.91580212)  
CCA [Yellow1] 822 points: (1.99160367 2.00000000)  
Steint [Yellow3] 253 points: (1.99266340 1.99984009)

Milalc\_AA [Coral] 451 points:  
Lead [Red] 650 points: (1.97717070 2.00000000)  
Orbfra [Blue] 1100 points: (1.99953831 2.00000000)  
Zoanth [Cyan] 650 points: (1.80576735 1.99938901)  
Cliona [Maroon] 1101 points: (1.99572956 2.00000000)  
Myali [Aquamarine] 309 points: (1.99221832 2.00000000)  
Sidsid [Sienna] 325 points: (1.90045849 2.00000000)  
Pordiv [Thistle] 395 points: (1.97003579 2.00000000)  
Moncav [Red2] 314 points: (1.98645284 2.00000000)  
Padina [Green1] 1000 points: (1.94657236 2.00000000)  
Dyctiota [Green3] 1000 points: (1.98885914 2.00000000)  
AlFilam [Blue2] 603 points: (1.99417739 2.00000000)  
CCA [Yellow1] 822 points: (1.40518497 1.98028034)  
Steint [Yellow3] 253 points: (1.97462016 2.00000000)

Myali [Aquamarine] 309 points:  
Lead [Red] 650 points: (1.99999955 2.00000000)  
Orbfra [Blue] 1100 points: (1.94434563 1.99730445)  
Zoanth [Cyan] 650 points: (1.99418043 1.99956544)  
Cliona [Maroon] 1101 points: (1.99722132 1.99986978)  
Milalc\_AA [Coral] 451 points: (1.99221832 2.00000000)  
Sidsid [Sienna] 325 points: (1.98791479 1.99656092)  
Pordiv [Thistle] 395 points: (0.73931617 0.80812589)  
Moncav [Red2] 314 points: (1.99319637 1.99930123)  
Padina [Green1] 1000 points: (1.97326130 1.98766378)  
Dyctiota [Green3] 1000 points: (1.89568978 1.97384358)  
AlFilam [Blue2] 603 points: (1.97729205 1.99597848)  
CCA [Yellow1] 822 points: (1.98787986 1.99999894)  
Steint [Yellow3] 253 points: (1.99804024 1.99998133)

Sidsid [Sienna] 325 points:  
Lead [Red] 650 points: (1.97973368 1.99990356)  
Orbfra [Blue] 1100 points: (1.99999962 2.00000000)

Zoanth [Cyan] 650 points: (0.98233410 1.11762266)  
Cliona [Maroon] 1101 points: (1.99999965 2.00000000)  
Milalc\_AA [Coral] 451 points: (1.90045849 2.00000000)  
Myali [Aquamarine] 309 points: (1.98791479 1.99656092)  
Pordiv [Thistle] 395 points: (1.90255603 1.94532513)  
Moncav [Red2] 314 points: (1.99831592 1.99999725)  
Padina [Green1] 1000 points: (1.97915763 1.99945777)  
Dyctiota [Green3] 1000 points: (1.99991869 1.99999757)  
AlFilam [Blue2] 603 points: (1.99998872 1.99999864)  
CCA [Yellow1] 822 points: (1.56985636 1.99660795)  
Steint [Yellow3] 253 points: (1.91952915 1.99739366)

Pordiv [Thistle] 395 points:

Lead [Red] 650 points: (1.99865262 2.00000000)  
Orbfra [Blue] 1100 points: (1.91968119 1.98201111)  
Zoanth [Cyan] 650 points: (1.83163038 1.95052898)  
Cliona [Maroon] 1101 points: (1.91233009 1.99993315)  
Milalc\_AA [Coral] 451 points: (1.97003579 2.00000000)  
Myali [Aquamarine] 309 points: (0.73931617 0.80812589)  
Sidsid [Sienna] 325 points: (1.90255603 1.94532513)  
Moncav [Red2] 314 points: (1.73458853 1.97764832)  
Padina [Green1] 1000 points: (1.72141481 1.82649184)  
Dyctiota [Green3] 1000 points: (1.61213874 1.80614887)  
AlFilam [Blue2] 603 points: (1.90522849 1.98138991)  
CCA [Yellow1] 822 points: (1.92480459 1.99963998)  
Steint [Yellow3] 253 points: (1.79154349 1.99442396)

Moncav [Red2] 314 points:

Lead [Red] 650 points: (1.99679017 1.99999891)  
Orbfra [Blue] 1100 points: (1.99509642 1.99999997)  
Zoanth [Cyan] 650 points: (1.91622578 1.99983876)  
Cliona [Maroon] 1101 points: (1.72171064 1.90187763)  
Milalc\_AA [Coral] 451 points: (1.98645284 2.00000000)  
Myali [Aquamarine] 309 points: (1.99319637 1.99930123)  
Sidsid [Sienna] 325 points: (1.99831592 1.99999725)  
Pordiv [Thistle] 395 points: (1.73458853 1.97764832)  
Padina [Green1] 1000 points: (1.45016462 1.70653912)  
Dyctiota [Green3] 1000 points: (1.09545837 1.32024294)  
AlFilam [Blue2] 603 points: (1.88794847 1.95787574)  
CCA [Yellow1] 822 points: (1.96647511 2.00000000)  
Steint [Yellow3] 253 points: (1.23688344 1.35950341)

Padina [Green1] 1000 points:

Lead [Red] 650 points: (1.99847798 1.99998926)  
Orbfra [Blue] 1100 points: (1.99510335 1.99981068)  
Zoanth [Cyan] 650 points: (1.84555313 1.99883684)  
Cliona [Maroon] 1101 points: (1.95551053 1.99747456)  
Milalc\_AA [Coral] 451 points: (1.94657236 2.00000000)  
Myali [Aquamarine] 309 points: (1.97326130 1.98766378)  
Sidsid [Sienna] 325 points: (1.97915763 1.99945777)

Pordiv [Thistle] 395 points: (1.72141481 1.82649184)  
Moncav [Red2] 314 points: (1.45016462 1.70653912)  
Dyctiota [Green3] 1000 points: (1.72410577 1.83075562)  
AlFilam [Blue2] 603 points: (1.97898484 1.99976261)  
CCA [Yellow1] 822 points: (1.94929069 1.99999999)  
Steint [Yellow3] 253 points: (1.17818701 1.40704608)

Dyctiota [Green3] 1000 points:

Lead [Red] 650 points: (1.99909193 1.99999999)  
Orbfra [Blue] 1100 points: (1.89269265 1.94038679)  
Zoanth [Cyan] 650 points: (1.97361589 1.99995263)  
Cliona [Maroon] 1101 points: (1.16940873 1.44977836)  
Milalc\_AA [Coral] 451 points: (1.98885914 2.00000000)  
Myali [Aquamarine] 309 points: (1.89568978 1.97384358)  
Sidsid [Sienna] 325 points: (1.99991869 1.99999757)  
Pordiv [Thistle] 395 points: (1.61213874 1.80614887)  
Moncav [Red2] 314 points: (1.09545837 1.32024294)  
Padina [Green1] 1000 points: (1.72410577 1.83075562)  
AlFilam [Blue2] 603 points: (1.61469525 1.75945208)  
CCA [Yellow1] 822 points: (1.97749344 2.00000000)  
Steint [Yellow3] 253 points: (1.83353848 1.96177709)

AlFilam [Blue2] 603 points:

Lead [Red] 650 points: (1.99860531 1.99999749)  
Orbfra [Blue] 1100 points: (1.97326699 1.99909584)  
Zoanth [Cyan] 650 points: (1.98929131 1.99999581)  
Cliona [Maroon] 1101 points: (1.82619579 1.91580212)  
Milalc\_AA [Coral] 451 points: (1.99417739 2.00000000)  
Myali [Aquamarine] 309 points: (1.97729205 1.99597848)  
Sidsid [Sienna] 325 points: (1.99998872 1.99999864)  
Pordiv [Thistle] 395 points: (1.90522849 1.98138991)  
Moncav [Red2] 314 points: (1.88794847 1.95787574)  
Padina [Green1] 1000 points: (1.97898484 1.99976261)  
Dyctiota [Green3] 1000 points: (1.61469525 1.75945208)  
CCA [Yellow1] 822 points: (1.98286951 2.00000000)  
Steint [Yellow3] 253 points: (1.99460154 1.99955617)

CCA [Yellow1] 822 points:

Lead [Red] 650 points: (1.95424889 1.99999686)  
Orbfra [Blue] 1100 points: (1.99959382 2.00000000)  
Zoanth [Cyan] 650 points: (1.51907933 1.82457268)  
Cliona [Maroon] 1101 points: (1.99160367 2.00000000)  
Milalc\_AA [Coral] 451 points: (1.40518497 1.98028034)  
Myali [Aquamarine] 309 points: (1.98787986 1.99999894)  
Sidsid [Sienna] 325 points: (1.56985636 1.99660795)  
Pordiv [Thistle] 395 points: (1.92480459 1.99963998)  
Moncav [Red2] 314 points: (1.96647511 2.00000000)  
Padina [Green1] 1000 points: (1.94929069 1.99999999)  
Dyctiota [Green3] 1000 points: (1.97749344 2.00000000)  
AlFilam [Blue2] 603 points: (1.98286951 2.00000000)

Steint [Yellow3] 253 points: (1.94325820 1.99999614)

Steint [Yellow3] 253 points:

Lead [Red] 650 points: (1.99657462 1.99991640)  
Orbfra [Blue] 1100 points: (1.99955367 2.00000000)  
Zoanth [Cyan] 650 points: (1.75436209 1.99383273)  
Cliona [Maroon] 1101 points: (1.99266340 1.99984009)  
Milalc\_AA [Coral] 451 points: (1.97462016 2.00000000)  
Myali [Aquamarine] 309 points: (1.99804024 1.99998133)  
Sidsid [Sienna] 325 points: (1.91952915 1.99739366)  
Pordiv [Thistle] 395 points: (1.79154349 1.99442396)  
Moncav [Red2] 314 points: (1.23688344 1.35950341)  
Padina [Green1] 1000 points: (1.17818701 1.40704608)  
Dyctiota [Green3] 1000 points: (1.83353848 1.96177709)  
AlFilam [Blue2] 603 points: (1.99460154 1.99955617)  
CCA [Yellow1] 822 points: (1.94325820 1.99999614)

Pair Separation (least to most);

Myali [Aquamarine] 309 points and Pordiv [Thistle] 395 points -  
0.73931617  
Zoanth [Cyan] 650 points and Sidsid [Sienna] 325 points - 0.98233410  
Moncav [Red2] 314 points and Dyctiota [Green3] 1000 points -  
1.09545837  
Cliona [Maroon] 1101 points and Dyctiota [Green3] 1000 points -  
1.16940873  
Padina [Green1] 1000 points and Steint [Yellow3] 253 points -  
1.17818701  
Moncav [Red2] 314 points and Steint [Yellow3] 253 points - 1.23688344  
Milalc\_AA [Coral] 451 points and CCA [Yellow1] 822 points - 1.40518497  
Moncav [Red2] 314 points and Padina [Green1] 1000 points - 1.45016462  
Zoanth [Cyan] 650 points and CCA [Yellow1] 822 points - 1.51907933  
Sidsid [Sienna] 325 points and CCA [Yellow1] 822 points - 1.56985636  
Pordiv [Thistle] 395 points and Dyctiota [Green3] 1000 points -  
1.61213874  
Dyctiota [Green3] 1000 points and AlFilam [Blue2] 603 points -  
1.61469525  
Pordiv [Thistle] 395 points and Padina [Green1] 1000 points -  
1.72141481  
Cliona [Maroon] 1101 points and Moncav [Red2] 314 points - 1.72171064  
Padina [Green1] 1000 points and Dyctiota [Green3] 1000 points -  
1.72410577  
Pordiv [Thistle] 395 points and Moncav [Red2] 314 points - 1.73458853  
Zoanth [Cyan] 650 points and Steint [Yellow3] 253 points - 1.75436209  
Pordiv [Thistle] 395 points and Steint [Yellow3] 253 points -  
1.79154349  
Zoanth [Cyan] 650 points and Milalc\_AA [Coral] 451 points - 1.80576735  
Cliona [Maroon] 1101 points and AlFilam [Blue2] 603 points -  
1.82619579  
Zoanth [Cyan] 650 points and Pordiv [Thistle] 395 points - 1.83163038



Dyctiota [Green3] 1000 points and Steint [Yellow3] 253 points -  
1.83353848  
Zoanth [Cyan] 650 points and Padina [Green1] 1000 points - 1.84555313  
Moncav [Red2] 314 points and AlFilam [Blue2] 603 points - 1.88794847  
Orbfra [Blue] 1100 points and Dyctiota [Green3] 1000 points -  
1.89269265  
Myali [Aquamarine] 309 points and Dyctiota [Green3] 1000 points -  
1.89568978  
Milalc\_AA [Coral] 451 points and Sidsid [Sienna] 325 points -  
1.90045849  
Sidsid [Sienna] 325 points and Pordiv [Thistle] 395 points -  
1.90255603  
Pordiv [Thistle] 395 points and AlFilam [Blue2] 603 points -  
1.90522849  
Cliona [Maroon] 1101 points and Pordiv [Thistle] 395 points -  
1.91233009  
Zoanth [Cyan] 650 points and Moncav [Red2] 314 points - 1.91622578  
Sidsid [Sienna] 325 points and Steint [Yellow3] 253 points -  
1.91952915  
Orbfra [Blue] 1100 points and Pordiv [Thistle] 395 points - 1.91968119  
Pordiv [Thistle] 395 points and CCA [Yellow1] 822 points - 1.92480459  
CCA [Yellow1] 822 points and Steint [Yellow3] 253 points - 1.94325820  
Orbfra [Blue] 1100 points and Myali [Aquamarine] 309 points -  
1.94434563  
Milalc\_AA [Coral] 451 points and Padina [Green1] 1000 points -  
1.94657236  
Padina [Green1] 1000 points and CCA [Yellow1] 822 points - 1.94929069  
Lead [Red] 650 points and CCA [Yellow1] 822 points - 1.95424889  
Lead [Red] 650 points and Zoanth [Cyan] 650 points - 1.95484797  
Cliona [Maroon] 1101 points and Padina [Green1] 1000 points -  
1.95551053  
Moncav [Red2] 314 points and CCA [Yellow1] 822 points - 1.96647511  
Milalc\_AA [Coral] 451 points and Pordiv [Thistle] 395 points -  
1.97003579  
Myali [Aquamarine] 309 points and Padina [Green1] 1000 points -  
1.97326130  
Orbfra [Blue] 1100 points and AlFilam [Blue2] 603 points - 1.97326699  
Zoanth [Cyan] 650 points and Dyctiota [Green3] 1000 points -  
1.97361589  
Milalc\_AA [Coral] 451 points and Steint [Yellow3] 253 points -  
1.97462016  
Lead [Red] 650 points and Milalc\_AA [Coral] 451 points - 1.97717070  
Myali [Aquamarine] 309 points and AlFilam [Blue2] 603 points -  
1.97729205  
Dyctiota [Green3] 1000 points and CCA [Yellow1] 822 points -  
1.97749344  
Padina [Green1] 1000 points and AlFilam [Blue2] 603 points -  
1.97898484  
Sidsid [Sienna] 325 points and Padina [Green1] 1000 points -  
1.97915763

Lead [Red] 650 points and Sidsid [Sienna] 325 points – 1.97973368  
 Orbfra [Blue] 1100 points and Cliona [Maroon] 1101 points – 1.98113921  
 AlFilam [Blue2] 603 points and CCA [Yellow1] 822 points – 1.98286951  
 Milalc\_AA [Coral] 451 points and Moncav [Red2] 314 points – 1.98645284  
 Myali [Aquamarine] 309 points and CCA [Yellow1] 822 points –  
 1.98787986  
 Myali [Aquamarine] 309 points and Sidsid [Sienna] 325 points –  
 1.98791479  
 Milalc\_AA [Coral] 451 points and Dyctiota [Green3] 1000 points –  
 1.98885914  
 Zoanth [Cyan] 650 points and AlFilam [Blue2] 603 points – 1.98929131  
 Cliona [Maroon] 1101 points and CCA [Yellow1] 822 points – 1.99160367  
 Milalc\_AA [Coral] 451 points and Myali [Aquamarine] 309 points –  
 1.99221832  
 Cliona [Maroon] 1101 points and Steint [Yellow3] 253 points –  
 1.99266340  
 Myali [Aquamarine] 309 points and Moncav [Red2] 314 points –  
 1.99319637  
 Milalc\_AA [Coral] 451 points and AlFilam [Blue2] 603 points –  
 1.99417739  
 Zoanth [Cyan] 650 points and Myali [Aquamarine] 309 points –  
 1.99418043  
 AlFilam [Blue2] 603 points and Steint [Yellow3] 253 points –  
 1.99460154  
 Orbfra [Blue] 1100 points and Moncav [Red2] 314 points – 1.99509642  
 Orbfra [Blue] 1100 points and Padina [Green1] 1000 points – 1.99510335  
 Cliona [Maroon] 1101 points and Milalc\_AA [Coral] 451 points –  
 1.99572956  
 Zoanth [Cyan] 650 points and Cliona [Maroon] 1101 points – 1.99633866  
 Lead [Red] 650 points and Steint [Yellow3] 253 points – 1.99657462  
 Lead [Red] 650 points and Moncav [Red2] 314 points – 1.99679017  
 Cliona [Maroon] 1101 points and Myali [Aquamarine] 309 points –  
 1.99722132  
 Myali [Aquamarine] 309 points and Steint [Yellow3] 253 points –  
 1.99804024  
 Sidsid [Sienna] 325 points and Moncav [Red2] 314 points – 1.99831592  
 Lead [Red] 650 points and Padina [Green1] 1000 points – 1.99847798  
 Lead [Red] 650 points and AlFilam [Blue2] 603 points – 1.99860531  
 Lead [Red] 650 points and Pordiv [Thistle] 395 points – 1.99865262  
 Lead [Red] 650 points and Dyctiota [Green3] 1000 points – 1.99909193  
 Orbfra [Blue] 1100 points and Milalc\_AA [Coral] 451 points –  
 1.99953831  
 Orbfra [Blue] 1100 points and Steint [Yellow3] 253 points – 1.99955367  
 Orbfra [Blue] 1100 points and CCA [Yellow1] 822 points – 1.99959382  
 Orbfra [Blue] 1100 points and Zoanth [Cyan] 650 points – 1.99975775  
 Sidsid [Sienna] 325 points and Dyctiota [Green3] 1000 points –  
 1.99991869  
 Sidsid [Sienna] 325 points and AlFilam [Blue2] 603 points – 1.99998872  
 Lead [Red] 650 points and Cliona [Maroon] 1101 points – 1.99999548  
 Lead [Red] 650 points and Orbfra [Blue] 1100 points – 1.99999889

Lead [Red] 650 points and Myali [Aquamarine] 309 points - 1.99999955  
Orbfra [Blue] 1100 points and Sidsid [Sienna] 325 points - 1.99999962  
Cliona [Maroon] 1101 points and Sidsid [Sienna] 325 points -  
1.99999965

Table S10. Confusion Matrix subplot B Full, 14 class, SVM, Local Sigma Filter, Majority Analysis

Overall Accuracy = (7760/9375) 82.7733%

Kappa Coefficient = 0.8117

|           |              | Ground Truth (Pixels) |           |           |           |
|-----------|--------------|-----------------------|-----------|-----------|-----------|
| Class     |              | Lead_AA               | Orbfra_AA | Zoanth_AA | Cliona_AA |
| Milalc_AA |              |                       |           |           |           |
| 0         | Unclassified | 0                     | 0         | 0         | 0         |
| 1         | Lead         | 650                   | 0         | 1         | 0         |
| 0         | Orbfra       | 0                     | 1065      | 0         | 0         |
| 33        | Zoanth       | 0                     | 0         | 609       | 0         |
| 0         | Cliona       | 0                     | 1         | 0         | 1015      |
| 291       | Milalc       | 0                     | 0         | 0         | 0         |
| 0         | Myali        | 0                     | 5         | 0         | 0         |
| 0         | Sidsid       | 0                     | 0         | 26        | 0         |
| 2         | Pordiv       | 0                     | 1         | 2         | 0         |
| 0         | Moncav       | 0                     | 0         | 5         | 1         |
| 9         | Padina       | 0                     | 1         | 1         | 4         |
| 0         | Dyctiota     | 0                     | 27        | 0         | 79        |
| 0         | AlFilam      | 0                     | 0         | 0         | 3         |
| 115       | CCA          | 0                     | 0         | 6         | 0         |
| 0         | Steint       | 0                     | 0         | 1         | 0         |
| 451       | Total        | 650                   | 1100      | 651       | 1102      |

|           |              | Ground Truth (Pixels) |           |           |           |
|-----------|--------------|-----------------------|-----------|-----------|-----------|
| Class     |              | Mycali_AA             | Sidsid_AA | Pordiv_AA | Moncav_AA |
| Padina_AA |              |                       |           |           |           |
| 0         | Unclassified | 0                     | 0         | 0         | 0         |
| 0         | Lead         | 0                     | 0         | 0         | 0         |

|      |          |     |     |     |     |
|------|----------|-----|-----|-----|-----|
| 0    | Orbfra   | 0   | 0   | 0   | 0   |
| 1    | Zoanth   | 0   | 62  | 5   | 0   |
| 1    | Cliona   | 0   | 0   | 2   | 2   |
| 0    | Milalc   | 0   | 0   | 0   | 0   |
| 0    | Myali    | 363 | 0   | 74  | 0   |
| 0    | Sidsid   | 0   | 284 | 15  | 0   |
| 0    | Pordiv   | 88  | 0   | 282 | 4   |
| 15   | Moncav   | 0   | 0   | 6   | 172 |
| 916  | Padina   | 0   | 0   | 7   | 21  |
| 44   | Dyctiota | 1   | 0   | 4   | 147 |
| 0    | AlFilam  | 0   | 0   | 2   | 0   |
| 0    | CCA      | 0   | 11  | 0   | 0   |
| 25   | Steint   | 0   | 0   | 10  | 23  |
| 1002 | Total    | 452 | 357 | 407 | 369 |

|       |              | Ground Truth (Pixels) |            | CCA_AA | Steint_AA |
|-------|--------------|-----------------------|------------|--------|-----------|
| Class |              | Dyctiota_AA           | AlFilam_AA |        |           |
| Total |              |                       |            |        |           |
| 0     | Unclassified | 0                     | 0          | 0      | 0         |
| 657   | Lead         | 0                     | 2          | 3      | 0         |
| 1155  | Orbfra       | 0                     | 90         | 0      | 0         |
| 733   | Zoanth       | 0                     | 0          | 11     | 12        |
| 1132  | Cliona       | 93                    | 18         | 0      | 0         |
| 327   | Milalc       | 0                     | 0          | 36     | 0         |
| 450   | Myali        | 0                     | 3          | 5      | 0         |
| 367   | Sidsid       | 0                     | 0          | 42     | 0         |
|       | Pordiv       | 2                     | 23         | 13     | 0         |

|      |          |      |     |     |     |
|------|----------|------|-----|-----|-----|
| 417  |          |      |     |     |     |
|      | Moncav   | 162  | 0   | 0   | 30  |
| 391  |          |      |     |     |     |
|      | Padina   | 38   | 0   | 0   | 103 |
| 1100 |          |      |     |     |     |
|      | Dyctiota | 698  | 7   | 0   | 0   |
| 1007 |          |      |     |     |     |
|      | AlFilam  | 19   | 478 | 0   | 0   |
| 502  |          |      |     |     |     |
|      | CCA      | 0    | 0   | 733 | 0   |
| 865  |          |      |     |     |     |
|      | Steint   | 9    | 0   | 0   | 204 |
| 272  |          |      |     |     |     |
|      | Total    | 1021 | 621 | 843 | 349 |
| 9375 |          |      |     |     |     |

|              |          | Ground Truth (Percent) |           | Zoanth_AA | Cliona_AA |
|--------------|----------|------------------------|-----------|-----------|-----------|
| Class        |          | Lead_AA                | Orbfra_AA |           |           |
| Milalc_AA    |          |                        |           |           |           |
| Unclassified |          | 0.00                   | 0.00      | 0.00      | 0.00      |
| 0.00         |          |                        |           |           |           |
|              | Lead     | 100.00                 | 0.00      | 0.15      | 0.00      |
| 0.22         |          |                        |           |           |           |
|              | Orbfra   | 0.00                   | 96.82     | 0.00      | 0.00      |
| 0.00         |          |                        |           |           |           |
|              | Zoanth   | 0.00                   | 0.00      | 93.55     | 0.00      |
| 7.32         |          |                        |           |           |           |
|              | Cliona   | 0.00                   | 0.09      | 0.00      | 92.11     |
| 0.00         |          |                        |           |           |           |
|              | Milalc   | 0.00                   | 0.00      | 0.00      | 0.00      |
| 64.52        |          |                        |           |           |           |
|              | Myali    | 0.00                   | 0.45      | 0.00      | 0.00      |
| 0.00         |          |                        |           |           |           |
|              | Sidsid   | 0.00                   | 0.00      | 3.99      | 0.00      |
| 0.00         |          |                        |           |           |           |
|              | Pordiv   | 0.00                   | 0.09      | 0.31      | 0.00      |
| 0.44         |          |                        |           |           |           |
|              | Moncav   | 0.00                   | 0.00      | 0.77      | 0.09      |
| 0.00         |          |                        |           |           |           |
|              | Padina   | 0.00                   | 0.09      | 0.15      | 0.36      |
| 2.00         |          |                        |           |           |           |
|              | Dyctiota | 0.00                   | 2.45      | 0.00      | 7.17      |
| 0.00         |          |                        |           |           |           |
|              | AlFilam  | 0.00                   | 0.00      | 0.00      | 0.27      |
| 0.00         |          |                        |           |           |           |
|              | CCA      | 0.00                   | 0.00      | 0.92      | 0.00      |
| 25.50        |          |                        |           |           |           |
|              | Steint   | 0.00                   | 0.00      | 0.15      | 0.00      |
| 0.00         |          |                        |           |           |           |

|        |        |        |        |        |
|--------|--------|--------|--------|--------|
| Total  | 100.00 | 100.00 | 100.00 | 100.00 |
| 100.00 |        |        |        |        |

| Class        | Ground Truth (Percent) |           | Pordiv_AA | Moncav_AA |
|--------------|------------------------|-----------|-----------|-----------|
|              | Mycali_AA              | Sidsid_AA |           |           |
| Padina_AA    |                        |           |           |           |
| Unclassified | 0.00                   | 0.00      | 0.00      | 0.00      |
| 0.00         |                        |           |           |           |
| Lead         | 0.00                   | 0.00      | 0.00      | 0.00      |
| 0.00         |                        |           |           |           |
| Orbfra       | 0.00                   | 0.00      | 0.00      | 0.00      |
| 0.00         |                        |           |           |           |
| Zoanth       | 0.00                   | 17.37     | 1.23      | 0.00      |
| 0.10         |                        |           |           |           |
| Cliona       | 0.00                   | 0.00      | 0.49      | 0.54      |
| 0.10         |                        |           |           |           |
| Milalc       | 0.00                   | 0.00      | 0.00      | 0.00      |
| 0.00         |                        |           |           |           |
| Myali        | 80.31                  | 0.00      | 18.18     | 0.00      |
| 0.00         |                        |           |           |           |
| Sidsid       | 0.00                   | 79.55     | 3.69      | 0.00      |
| 0.00         |                        |           |           |           |
| Pordiv       | 19.47                  | 0.00      | 69.29     | 1.08      |
| 0.00         |                        |           |           |           |
| Moncav       | 0.00                   | 0.00      | 1.47      | 46.61     |
| 1.50         |                        |           |           |           |
| Padina       | 0.00                   | 0.00      | 1.72      | 5.69      |
| 91.42        |                        |           |           |           |
| Dyctiota     | 0.22                   | 0.00      | 0.98      | 39.84     |
| 4.39         |                        |           |           |           |
| AlFilam      | 0.00                   | 0.00      | 0.49      | 0.00      |
| 0.00         |                        |           |           |           |
| CCA          | 0.00                   | 3.08      | 0.00      | 0.00      |
| 0.00         |                        |           |           |           |
| Steint       | 0.00                   | 0.00      | 2.46      | 6.23      |
| 2.50         |                        |           |           |           |
| Total        | 100.00                 | 100.00    | 100.00    | 100.00    |
| 100.00       |                        |           |           |           |

| Class        | Ground Truth (Percent) |            | CCA_AA | Steint_AA |
|--------------|------------------------|------------|--------|-----------|
|              | Dyctiota_AA            | AlFilam_AA |        |           |
| Total        |                        |            |        |           |
| Unclassified | 0.00                   | 0.00       | 0.00   | 0.00      |
| 0.00         |                        |            |        |           |
| Lead         | 0.00                   | 0.32       | 0.36   | 0.00      |
| 7.01         |                        |            |        |           |
| Orbfra       | 0.00                   | 14.49      | 0.00   | 0.00      |
| 12.32        |                        |            |        |           |

|        |          |        |        |        |        |
|--------|----------|--------|--------|--------|--------|
| 7.82   | Zoanth   | 0.00   | 0.00   | 1.30   | 3.44   |
| 12.07  | Cliona   | 9.11   | 2.90   | 0.00   | 0.00   |
| 3.49   | Milalc   | 0.00   | 0.00   | 4.27   | 0.00   |
| 4.80   | Myali    | 0.00   | 0.48   | 0.59   | 0.00   |
| 3.91   | Sidsid   | 0.00   | 0.00   | 4.98   | 0.00   |
| 4.45   | Pordiv   | 0.20   | 3.70   | 1.54   | 0.00   |
| 4.17   | Moncav   | 15.87  | 0.00   | 0.00   | 8.60   |
| 11.73  | Padina   | 3.72   | 0.00   | 0.00   | 29.51  |
| 10.74  | Dyctiota | 68.36  | 1.13   | 0.00   | 0.00   |
| 5.35   | AlFilam  | 1.86   | 76.97  | 0.00   | 0.00   |
| 9.23   | CCA      | 0.00   | 0.00   | 86.95  | 0.00   |
| 2.90   | Steint   | 0.88   | 0.00   | 0.00   | 58.45  |
| 100.00 | Total    | 100.00 | 100.00 | 100.00 | 100.00 |

| Class    | Commission | Omission  | Commission |
|----------|------------|-----------|------------|
| Omission | (Percent)  | (Percent) | (Pixels)   |
| (Pixels) |            |           |            |
| Lead     | 1.07       | 0.00      | 7/657      |
| 0/650    |            |           |            |
| Orbfra   | 7.79       | 3.18      | 90/1155    |
| 35/1100  |            |           |            |
| Zoanth   | 16.92      | 6.45      | 124/733    |
| 42/651   |            |           |            |
| Cliona   | 10.34      | 7.89      | 117/1132   |
| 87/1102  |            |           |            |
| Milalc   | 11.01      | 35.48     | 36/327     |
| 160/451  |            |           |            |
| Myali    | 19.33      | 19.69     | 87/450     |
| 89/452   |            |           |            |
| Sidsid   | 22.62      | 20.45     | 83/367     |
| 73/357   |            |           |            |
| Pordiv   | 32.37      | 30.71     | 135/417    |
| 125/407  |            |           |            |



|                      |       |       |          |
|----------------------|-------|-------|----------|
| Moncav<br>197/369    | 56.01 | 53.39 | 219/391  |
| Padina<br>86/1002    | 16.73 | 8.58  | 184/1100 |
| Dyctiota<br>323/1021 | 30.69 | 31.64 | 309/1007 |
| AlFilam<br>143/621   | 4.78  | 23.03 | 24/502   |
| CCA<br>110/843       | 15.26 | 13.05 | 132/865  |
| Steint<br>145/349    | 25.00 | 41.55 | 68/272   |

| Class<br>User Acc.<br>(Pixels) | Prod. Acc.<br>(Percent) | User Acc.<br>(Percent) | Prod. Acc.<br>(Pixels) |
|--------------------------------|-------------------------|------------------------|------------------------|
| Lead<br>650/657                | 100.00                  | 98.93                  | 650/650                |
| Orbfra<br>1065/1155            | 96.82                   | 92.21                  | 1065/1100              |
| Zoanth<br>609/733              | 93.55                   | 83.08                  | 609/651                |
| Cliona<br>1015/1132            | 92.11                   | 89.66                  | 1015/1102              |
| Milalc<br>291/327              | 64.52                   | 88.99                  | 291/451                |
| Myali<br>363/450               | 80.31                   | 80.67                  | 363/452                |
| Sidsid<br>284/367              | 79.55                   | 77.38                  | 284/357                |
| Pordiv<br>282/417              | 69.29                   | 67.63                  | 282/407                |
| Moncav<br>172/391              | 46.61                   | 43.99                  | 172/369                |
| Padina<br>916/1100             | 91.42                   | 83.27                  | 916/1002               |
| Dyctiota<br>698/1007           | 68.36                   | 69.31                  | 698/1021               |
| AlFilam<br>478/502             | 76.97                   | 95.22                  | 478/621                |
| CCA<br>733/865                 | 86.95                   | 84.74                  | 733/843                |
| Steint<br>204/272              | 58.45                   | 75.00                  | 204/349                |
